# Supplementary material for: Widespread diffuse venting and large microbial iron-mounds in the Red Sea
Source: Springer Nature journal article supplement (doi:10.1038/s43247-023-01169-7), 2023-12-21
Supplement: MOESM2 [file 43247_2023_1169_MOESM2_ESM.pdf]

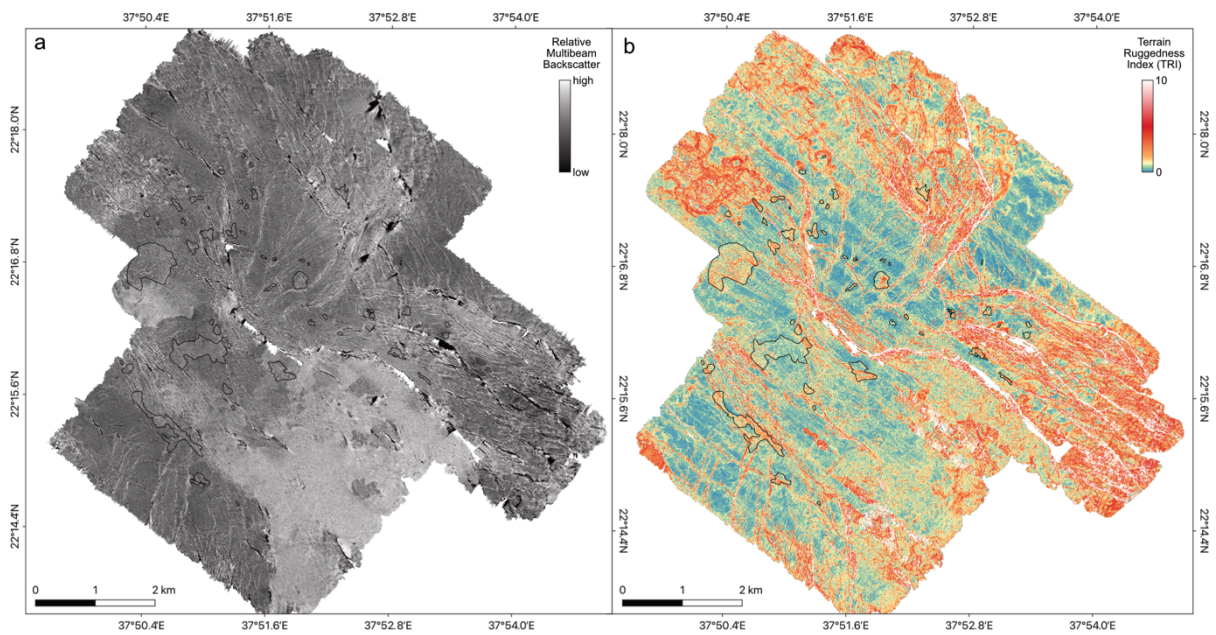

**Supplementary Figure 1 - (a)** AUV multibeam backscatter mosaic (1 m spatial resolution) of the summit of Hatiba Mons volcano. Low backscatter areas (smooth surface, highly sedimented) are shown in dark and high backscatter areas (rough surface, low- or no sediment) are in bright tones. The complex network of faults and fissures is highly visible in the mosaic. The youngest lava is primarily present in the rift axis (see also Figure 2 in the main text). The high-resolution backscatter mosaic is available for download from the Pangaea repository <https://doi.pangaea.de/10.1594/PANGAEA.956871> **(b)** Terrain ruggedness index of AUV data from Hatiba Mons. The areas with the highest TRI at relatively large scales are caused by the volcanic mounds in the central valley and the most heavily faulted zones. Higher TRI values also define Fe-mounds but at significantly smaller scales. The black outlines mark all mapped hydrothermal fields at Hatiba Mons, including confirmed and unconfirmed fields.

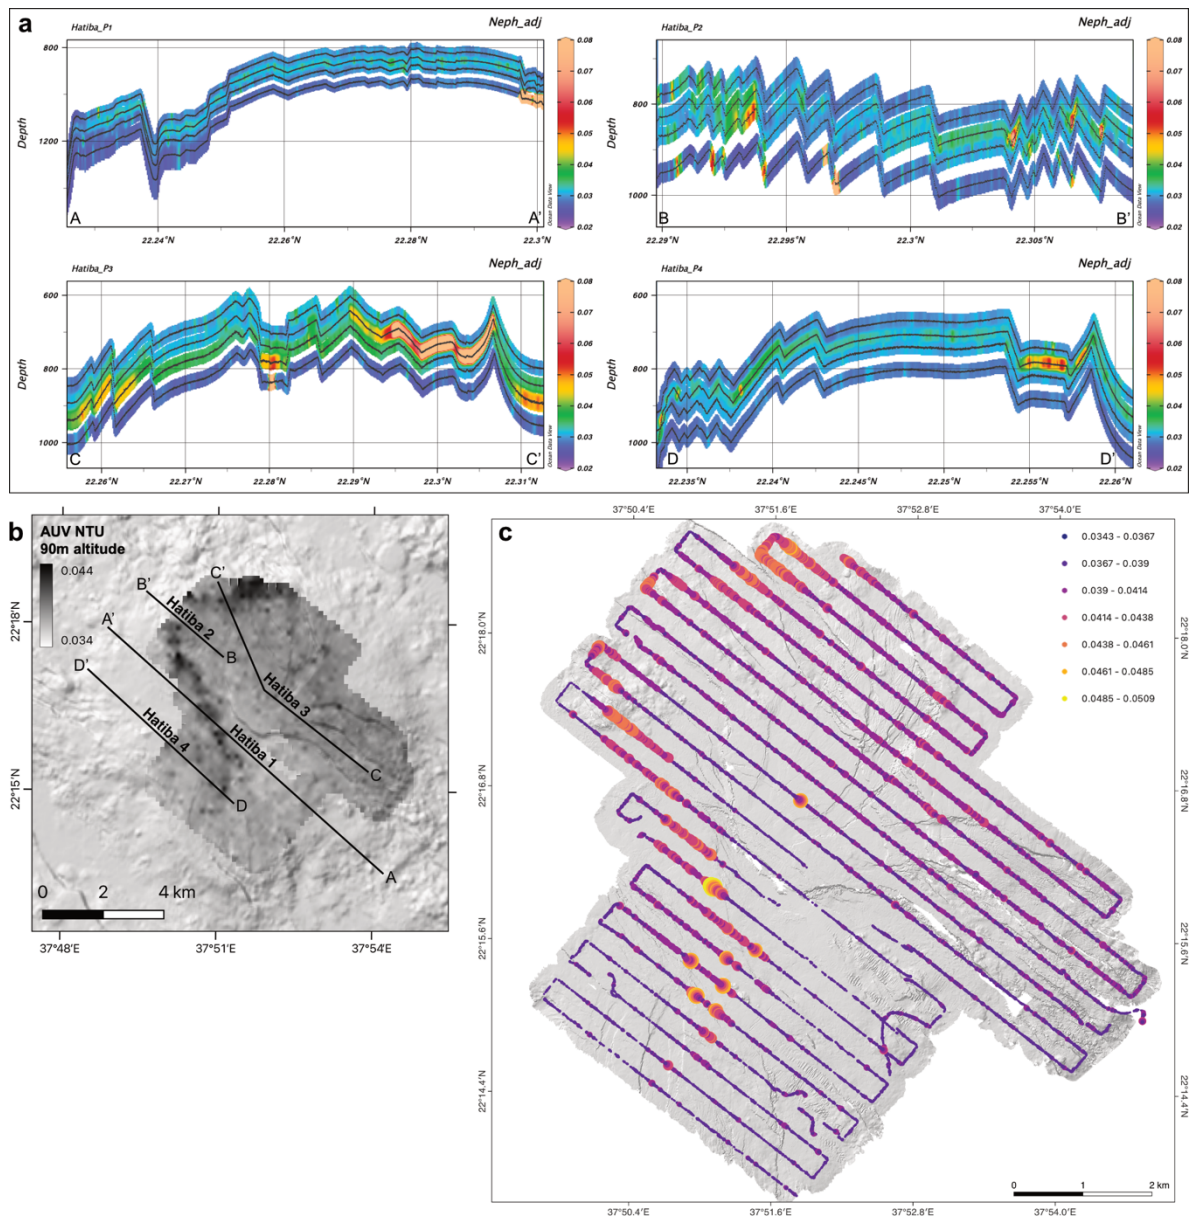

**Supplementary Figure 2** - Turbidity anomalies at the Hatiba Mons volcano. **(a)** Visualization of MAPR tow-yo data (Miniature Autonomous Plume Recorder) measured in October/November 2021 (*RV Azizi*). Five MAPRs were mounted on the cable at an equal distance of 50 m. **(b)** Positions of the MAPR profiles shown in (a) and 150 m gridded turbidity anomalies at 90 m altitude from an AUV survey in February 2022 (*OSS Handin Tide*). **(c)** Detailed map of the AUV-derived turbidity anomalies, 90 m above ground over Hatiba Mons. The gaps in the track lines are due to failed merging of the processed AUV navigation with the raw turbidity data and therefore raw navigation was used instead. Since there are no significant signals within the affected areas, this does not disturb the overall turbidity pattern. Although measured in different months, all data (MAPR and AUV) reveal the most significant anomalies in the northern valley and at the western axial graben. However, the source of the turbidity anomalies remains unknown due to the lack of detailed bottom current data.

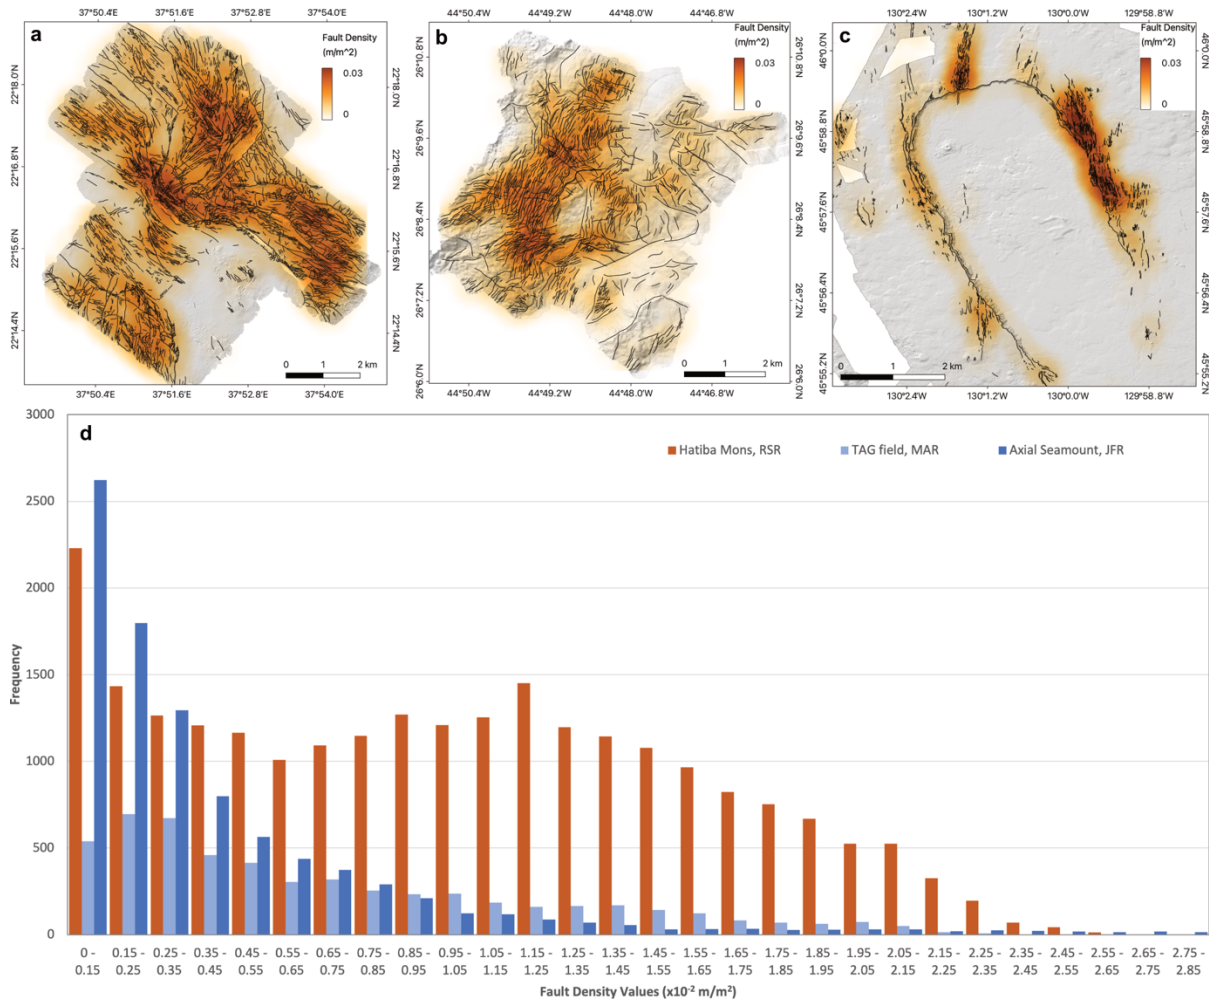

**Supplementary Figure 3 - (a-c)** Fault density maps of Hatiba Mons (Red Sea Rift, this study), the TAG Hydrothermal Field (Mid-Atlantic Ridge; Graber et al., 2020<sup>1</sup>), and Axial Volcano (Juan de Fuca Ridge; Clague et al., 2022<sup>2</sup>). The fault maps were derived from high-resolution (1–2 m) AUV bathymetry, and density was calculated with the *GDAL Line density* module in QGIS. The line density algorithm calculates the density of linear features in a circular neighborhood within a raster cell. The total lengths of all lines intersected by the search radius (set to  $r=500$  m) are divided by the area. The line density's pixel size (cell size) was set to 100 m. The size of the search area per cell is  $7.85 \times 10^5 m^2$  ( $r=500$  m,  $A=\pi \cdot r^2$ ). For example, a fault density value of  $1 \times 10^{-2} m/m^2$  equals a summed-up fault and fissure length of 7.85 km within the search radius. **(d)** Fault density histograms from data of the above-shown areas. The histogram shows a significantly higher amount of high fault density areas at Hatiba Mons volcano compared to the two other mid-ocean ridge segments, known for the presence of several active and inactive high-T vent sites. This high number of faults and fissures, combined with the positive relief of the Hatiba Mons volcano, emphasizes a very effective cooling of the crust. In addition, larger parts (50%) of the surface of Hatiba Mons show a high fault density ( $>1 \times 10^{-2} m/m^2$ ), when compared to TAG (25%) and Axial Seamount ( $<10\%$ ).

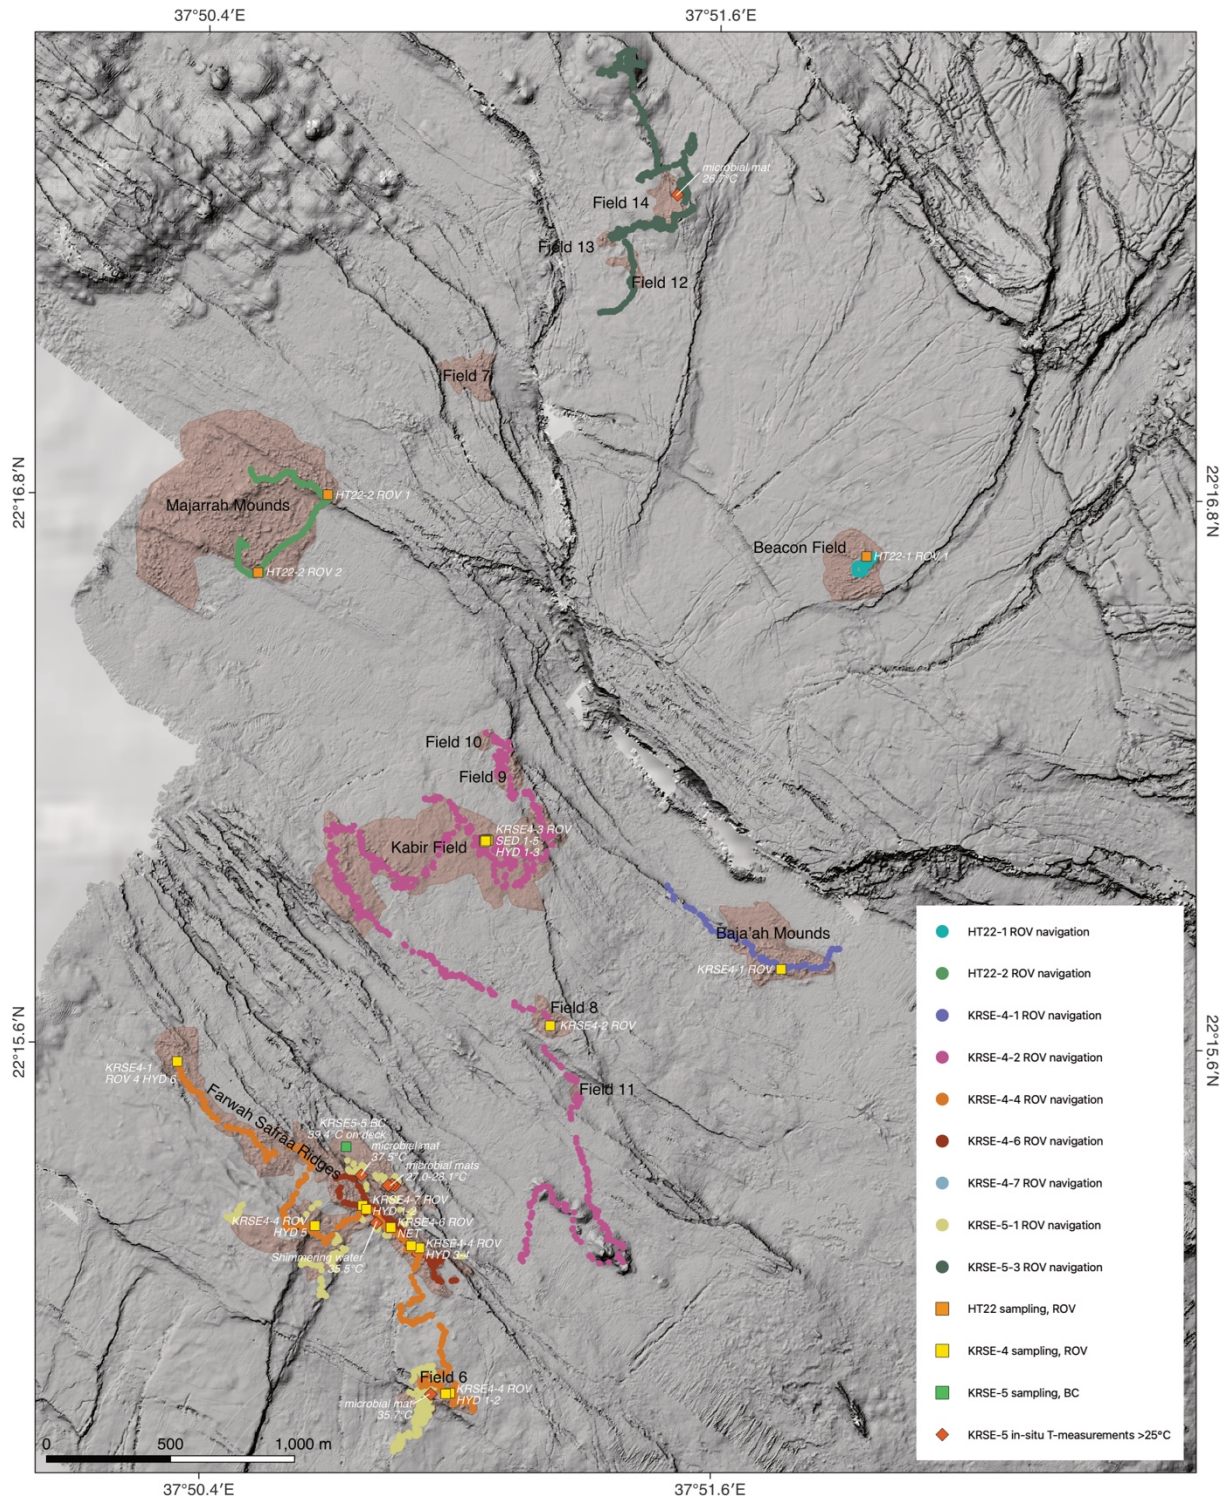

**Supplementary Figure 4** - Track lines of ROV dives (color-coded lines) and sampling locations (yellow squares) of the 2022 campaigns superimposed on shaded AUV bathymetry of the Hatiba Mons summit area. Confirmed mound fields are marked pale-reddish. The USBL navigation accuracy in February 2022 was  $\pm 2$  m, while the dives in May 2022 had an accuracy of  $\pm 50$  m. Positions and temperatures of in-situ temperature measurements, with an untethered HOBO T-logger (see also Methods section), are also given in the map. HT22 = Fugro OSS Handin Tide cruise in 02/2022, KRSE-4 = KAUST Red Sea Expedition 4 in 05/2022 (RV Aegaeo), KRSE-5 = KAUST Red Sea Expedition 5 in 02/2023 (RV Aegaeo), ROV = Remotely Operated Vehicle, BC=Box Corer.

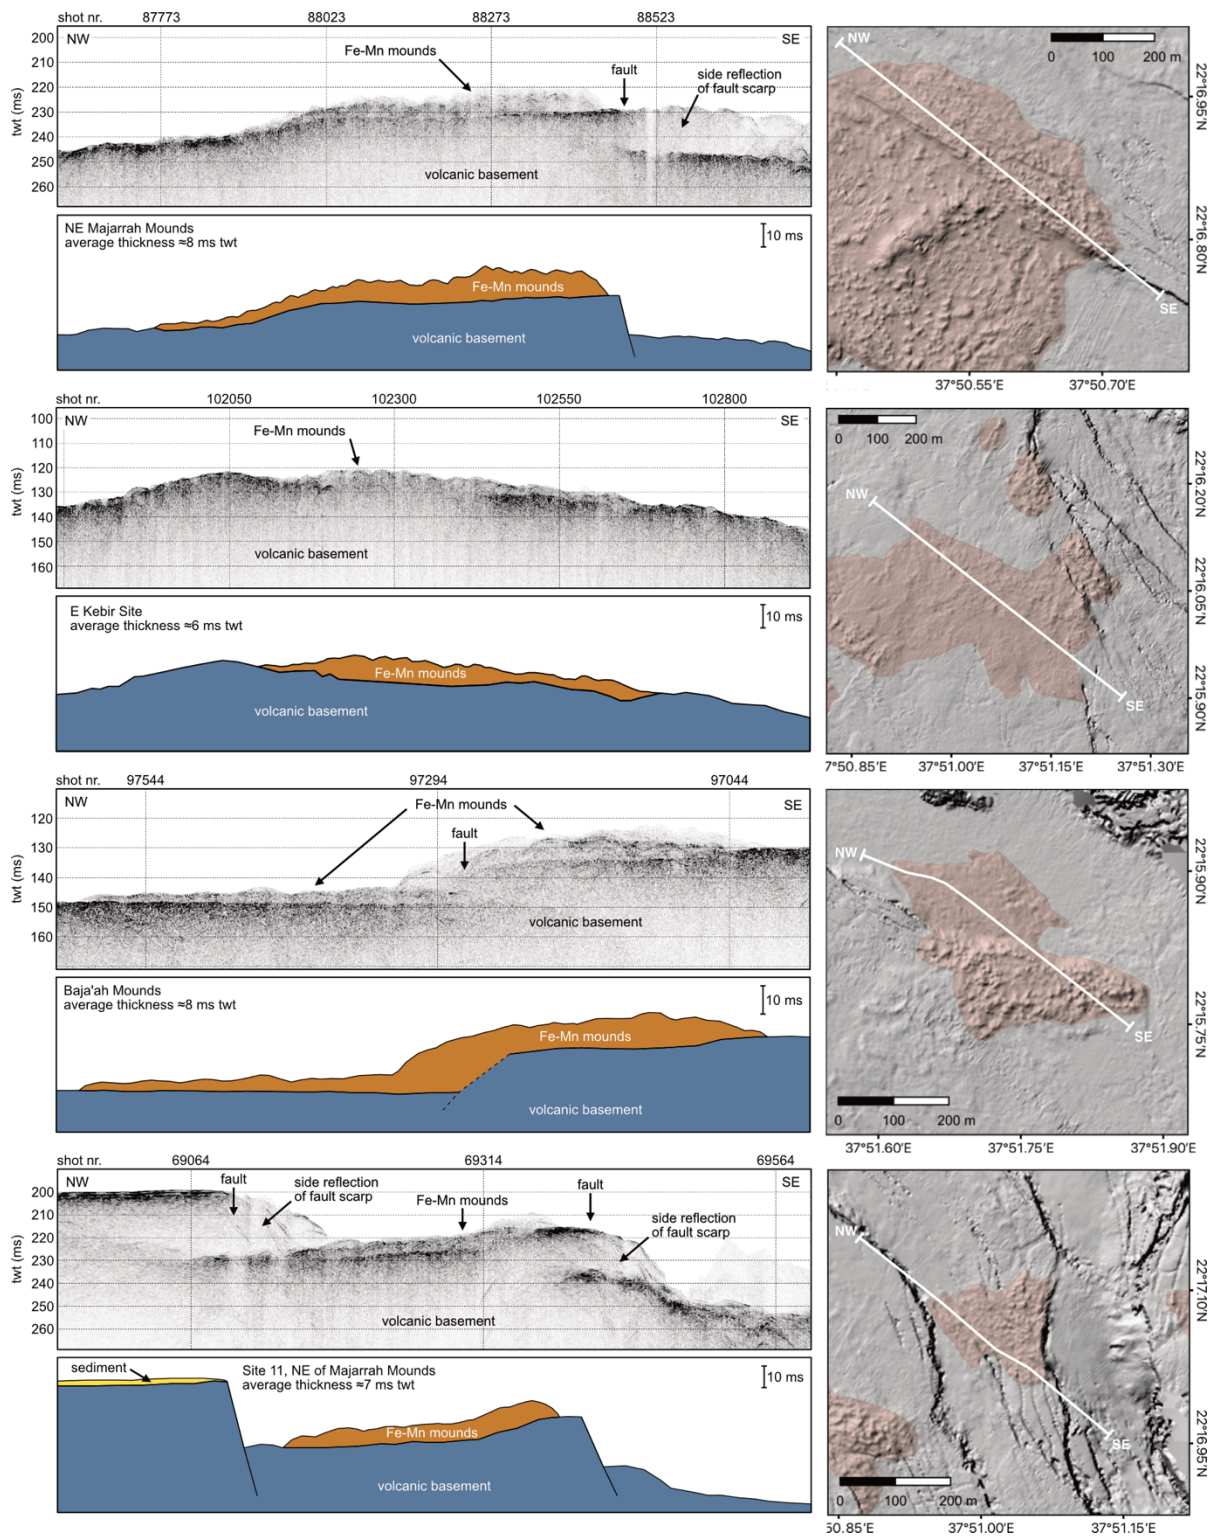

**Supplementary Figure 5** - AUV sub-bottom profiles (SBP) and interpretations over several of the Fe-mound fields. The profiles show that the hydrothermal mounds lie on top of the basaltic basement with thicknesses of 6-8 m two-way-travel-time (twt), which equals 4.8–6.4 m (with an assumed sound velocity of 1600 m/s).

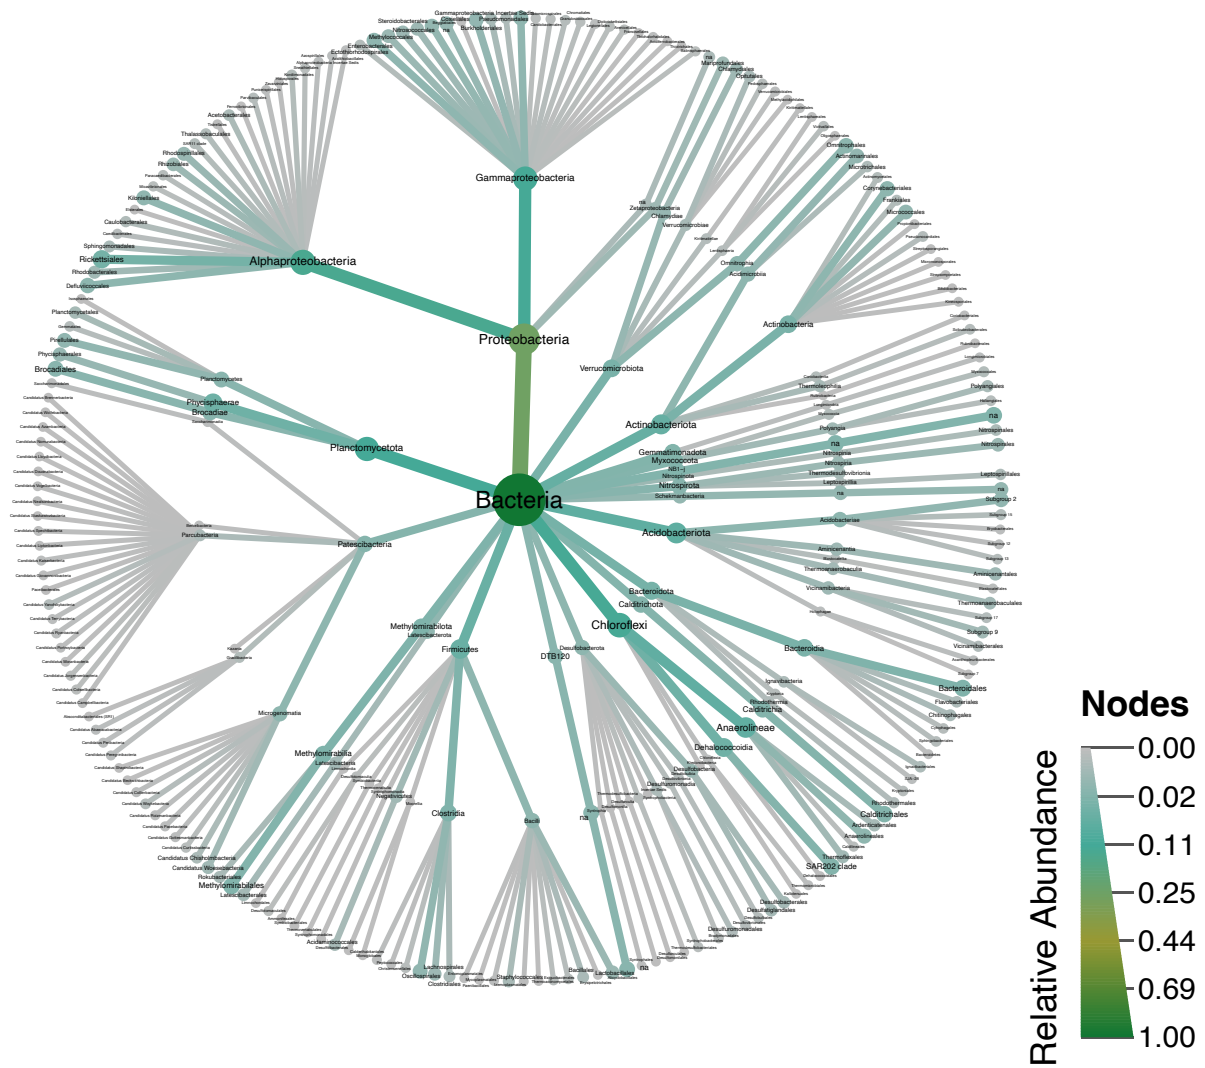

**Supplementary Figure 6** - Dendrogram showing the relative abundance of the top twenty taxa at different ranks present in KRSE4-2 ROV, KRSE4-3 ROV, KRSE4-4 ROV, KRSE4-6 ROV samples obtained from 16S rRNA gene sequencing.

**Supplementary Table 1: Sample locations**

| Sample name       | Latitude (°N) | Longitude(°E) | Depth (m) | Hydrothermal field               | Sample type                                                           |
|-------------------|---------------|---------------|-----------|----------------------------------|-----------------------------------------------------------------------|
| KRSE4-1 ROV HYD   | 22° 15.77     | 37° 51.76     | 1003      | Baja'ah Mounds                   | Rock fragments from base type 1B chimney with microbes                |
| KRSE4-2 ROV HYD   | 22° 15.64     | 37° 51.22     | 947       | Field 8                          | Rock fragment from type 1A chimney with minor microbes                |
| KRSE4-3 ROV HYD 1 | 22° 16.05     | 37° 51.06     | 960       | Kabir Field                      | Type 1A chimney                                                       |
| KRSE4-3 ROV HYD 2 | 22° 16.05     | 37° 51.06     | 960       | Kabir Field                      | Crust of mound side                                                   |
| KRSE4-3 ROV HYD 3 | 22° 16.05     | 37° 51.06     | 960       | Kabir Field                      | Crust of mound side                                                   |
| KRSE4-3 ROV SED 1 | 22° 16.05     | 37° 51.06     | 960       | Kabir Field                      | Sedimentary push core in type 3A mat                                  |
| KRSE4-3 ROV SED 2 | 22° 16.05     | 37° 51.06     | 960       | Kabir Field                      | Sedimentary push core in type 2A-3A mat                               |
| KRSE4-3 ROV SED 3 | 22° 16.05     | 37° 51.06     | 960       | Kabir Field                      | Sedimentary push core in type 3B white patch                          |
| KRSE4-3 ROV SED 4 | 22° 16.05     | 37° 51.06     | 960       | Kabir Field                      | Sedimentary push core in type 2A-3A mat                               |
| KRSE4-3 ROV SED 5 | 22° 16.05     | 37° 51.06     | 960       | Kabir Field                      | Sedimentary push core in type 3B white patch                          |
| KRSE4-4 ROV HYD 1 | 22° 14.84     | 37° 50.99     | 897       | Field 6                          | Crust of mound side                                                   |
| KRSE4-4 ROV HYD 2 | 22° 14.84     | 37° 50.98     | 896       | Field 6                          | Crust of mound side                                                   |
| KRSE4-4 ROV HYD 3 | 22° 15.16     | 37° 50.91     | 890       | Farwah Safraa ridges             | Rock fragments of type 1A chimney                                     |
| KRSE4-4 ROV HYD 4 | 22° 15.16     | 37° 50.89     | 887       | Farwah Safraa ridges             | Type 1A chimney with microbes                                         |
| KRSE4-4 ROV HYD 5 | 22° 15.20     | 37° 50.67     | 871       | Farwah Safraa ridges             | Rock fragments from base type 1A chimney                              |
| KRSE4-4 ROV HYD 6 | 22° 15.56     | 37° 50.34     | 858       | Farwah Safraa ridges             | Rock fragments of type 2A crust with microbes                         |
| KRSE4-4 ROV HYD X | undefined     | undefined     | undefined | Farwah Safraa ridges and field 6 | Rock fragments from ROV dive 6 with undefined sample location         |
| KRSE4-6 ROV NET   | 22° 15.20     | 37° 50.85     | 884       | Farwah Safraa ridges             | Microbial mat                                                         |
| KRSE4-7 ROV HYD 1 | 22° 15.25     | 37° 50.78     | 875       | Farwah Safraa ridges             | Type 2A chimney with microbes that displayed shimmering water venting |
| KRSE4-7 ROV HYD 2 | 22° 15.24     | 37° 50.79     | 875       | Farwah Safraa ridges             | Type 1B chimney with microbes                                         |
| KRSE5-5 BC        | 22° 15.38     | 37° 50.74     | 897       | Farwah Safraa ridges             | Grainy green sediment with red patches at bottom                      |
| HT22-1 ROV 1      | 22°16.674'N   | 37°51.951'E   | 855       | Beacon Field                     | Crust of mound side                                                   |
| HT22-2 ROV 1      | 22°16.800'N   | 37°50.685'E   | 949       | Majarrah Mounds                  | Crust of mound side                                                   |
| HT22-2 ROV 2      | 22°16.629'N   | 37°50.523'E   | 973       | Majarrah Mounds                  | Basalt from lava field                                                |

**Supplementary Table 2: Mineralogy and Chemistry**

| <b>Sample name</b>                                                         | <b>Rock type</b>                          | <b>XRD mineralogy</b>                    |
|----------------------------------------------------------------------------|-------------------------------------------|------------------------------------------|
| KRSE4-3 ROV HYD 1                                                          | Fe-oxyhydroxide (ochre)                   | x-ray amorph                             |
| KRSE4-3 ROV HYD 2A                                                         | Si-Fe oxyhydroxide (green)                | x-ray amorph, nontronite                 |
| KRSE4-3 ROV HYD 2B                                                         | Fe-oxyhydroxide (ochre)                   | x-ray amorph                             |
| KRSE4-3 ROV HYD 1A                                                         | Fe-oxyhydroxide (ochre)                   | x-ray amorph                             |
| KRSE4-3 ROV HYD 1B                                                         | Fe-oxyhydroxide (ochre)                   | x-ray amorph                             |
| KRSE4-4 ROV HYD 2                                                          | Mn-oxide (black)                          | x-ray amorph                             |
| KRSE4-4 ROV HYD XA                                                         | Si-Fe oxyhydroxide (green, yellow-orange) | x-ray amorph, nontronite                 |
| KRSE4-4 ROV HYD XB                                                         | Mn-oxide (black)                          | x-ray amorph, todorokite, halite, quartz |
| KRSE4-4 ROV HYD XC                                                         | Si-Fe oxyhydroxide (green)                | x-ray amorph, nontronite                 |
| KRSE4-7 ROV HYD 2A                                                         | Mn-oxide (black-red)                      | x-ray amorph, halite                     |
| KRSE4-7 ROV HYD 2B                                                         | Fe-oxyhydroxide (ochre)                   | x-ray amorph, halite                     |
| HT22-1 ROV 1                                                               | Mn-oxide (black)                          | x-ray amorph                             |
| HT22-2 ROV 1                                                               | Fe-oxyhydroxide (ochre)                   | x-ray amorph                             |
|                                                                            |                                           |                                          |
| <b>Nod-P-1 Standard</b>                                                    | Mn nodule                                 | NA                                       |
|                                                                            |                                           |                                          |
| HT22-2 ROV 2A                                                              | Basalt glass                              | NA                                       |
| HT22-2 ROV 2B                                                              | Basalt glass                              | NA                                       |
| HT22-2 ROV 2C                                                              | Basalt glass                              | NA                                       |
|                                                                            |                                           |                                          |
| <b>Average Red Sea (van der Zwan et al. 2015<sup>3</sup>)</b>              | Basalt average                            | NA                                       |
| <i>StDev Red Sea</i>                                                       |                                           |                                          |
| <b>Average Hatiba-Hadarba Deep (van der Zwan et al., 2015<sup>3</sup>)</b> | Basalt average                            | NA                                       |
| <i>StDev Hatiba-Hadarba Deep</i>                                           |                                           |                                          |



Supplementary Table 2: Mineralogy and Chemistry (*continued*)

| Sample name                        | SiO <sub>2</sub> (%) | TiO <sub>2</sub> (%) | Al <sub>2</sub> O <sub>3</sub> (%) | Fe <sub>2</sub> O <sub>3</sub> (%) | MnO (%)     | MgO (%)     | CaO (%)     | Na <sub>2</sub> O (%) | K <sub>2</sub> O (%) | P <sub>2</sub> O <sub>5</sub> (%) |
|------------------------------------|----------------------|----------------------|------------------------------------|------------------------------------|-------------|-------------|-------------|-----------------------|----------------------|-----------------------------------|
| KRSE4-3 ROV HYD 1                  | 16.28                | <0.01                | 0.24                               | 55.41                              | 0.65        | 1.59        | 1.68        | 5.11                  | 0.28                 | 0.55                              |
| KRSE4-3 ROV HYD 2A                 | 44.2                 | <0.01                | 0.01                               | 40.01                              | 0.08        | 2.5         | 0.3         | 2.06                  | 2.61                 | 0.09                              |
| KRSE4-3 ROV HYD 2B                 | 13.6                 | 0.03                 | 0.39                               | 43.77                              | 3.3         | 2.14        | 10.12       | 2.94                  | 0.31                 | 0.64                              |
| KRSE4-3 ROV HYD 1A                 | 19.11                | <0.01                | 0.15                               | 55.51                              | 4.87        | 1.06        | 0.56        | 3                     | 0.31                 | 0.41                              |
| KRSE4-3 ROV HYD 1B                 | 19.14                | 0.09                 | 1.14                               | 59.08                              | 2.67        | 0.98        | 0.48        | 2.68                  | 0.35                 | 0.41                              |
| KRSE4-4 ROV HYD 2                  | 20.66                | 0.26                 | 2.52                               | 15.7                               | 23.23       | 4.47        | 9.21        | 2.5                   | 1.1                  | 0.13                              |
| KRSE4-4 ROV HYD XA                 | 40.09                | 0.01                 | 0.15                               | 40.8                               | 0.66        | 2.48        | 0.53        | 2.85                  | 1.79                 | 0.14                              |
| KRSE4-4 ROV HYD XB                 | 3.84                 | 0.03                 | 0.78                               | 7.53                               | 31.82       | 5.39        | 17          | 2.53                  | 0.84                 | 0.17                              |
| KRSE4-4 ROV HYD XC                 | 43.19                | <0.01                | 0.06                               | 39.55                              | 0.19        | 2.66        | 0.51        | 2.62                  | 2.1                  | 0.11                              |
| KRSE4-7 ROV HYD 2A                 | 12.3                 | 0.02                 | 0.26                               | 26.45                              | 29.61       | 2.52        | 2.06        | 5.06                  | 0.71                 | 0.23                              |
| KRSE4-7 ROV HYD 2B                 | 22.38                | 0.01                 | 0.16                               | 47.54                              | 0.89        | 1.29        | 1.29        | 6.22                  | 0.47                 | 0.33                              |
| HT22-1 ROV 1                       | 31.65                | 0.05                 | 0.54                               | 28.53                              | 17.09       | 3.04        | 0.91        | 3.01                  | 1.71                 | 0.17                              |
| HT22-2 ROV 1                       | 18.66                | 0.02                 | 0.34                               | 45.77                              | 3.95        | 2.38        | 7.46        | 2.27                  | 0.61                 | 0.47                              |
|                                    |                      |                      |                                    |                                    |             |             |             |                       |                      |                                   |
| <b>Nod-P-1 Standard</b>            | 14.42                | 0.45                 | 4.68                               | 8.36                               | 37.85       | 3.32        | 3.00        | 2.21                  | 1.21                 | 0.46                              |
|                                    |                      |                      |                                    |                                    |             |             |             |                       |                      |                                   |
| HT22-2 ROV 2A                      | 50.60                | 1.63                 | 14.40                              | 11.91                              | 0.19        | 6.73        | 11.67       | 2.77                  | 0.15                 | 0.13                              |
| HT22-2 ROV 2B                      | 50.44                | 1.64                 | 14.32                              | 11.88                              | 0.19        | 6.75        | 11.59       | 2.80                  | 0.15                 | 0.11                              |
| HT22-2 ROV 2C                      | 49.80                | 1.63                 | 14.42                              | 11.79                              | 0.19        | 6.75        | 11.67       | 2.79                  | 0.15                 | 0.13                              |
|                                    |                      |                      |                                    |                                    |             |             |             |                       |                      |                                   |
| <b>Average Red Sea</b>             | 50.05                | 1.55                 | 14.75                              | 10.96                              | 0.19        | 7.41        | 11.65       | 2.67                  | 0.19                 | 0.13                              |
| <i>StDev Red Sea</i>               | <i>0.63</i>          | <i>0.33</i>          | <i>0.59</i>                        | <i>1.30</i>                        | <i>0.03</i> | <i>0.79</i> | <i>0.79</i> | <i>0.37</i>           | <i>0.14</i>          | <i>0.06</i>                       |
| <b>Average Hatiba-Hadarba Deep</b> | 49.57                | 1.75                 | 14.61                              | 11.63                              | 0.19        | 7.28        | 11.42       | 2.64                  | 0.15                 | 0.15                              |
| <i>StDev Hatiba-Hadarba Deep</i>   | <i>0.27</i>          | <i>0.22</i>          | <i>0.23</i>                        | <i>0.57</i>                        | <i>0.02</i> | <i>0.47</i> | <i>0.45</i> | <i>0.13</i>           | <i>0.03</i>          | <i>0.03</i>                       |

Supplementary Table 2: Mineralogy and Chemistry (*continued*)

| Sample name                        | BaO (%) | Cr <sub>2</sub> O <sub>3</sub> (%) | Cl (%) | F (%) | SO <sub>3</sub> (%) | Total (%) | LOI at 1000°C (%) | C (%) | S (%) | Li (ppm) |
|------------------------------------|---------|------------------------------------|--------|-------|---------------------|-----------|-------------------|-------|-------|----------|
| KRSE4-3 ROV HYD 1                  | <0.01   | <0.01                              |        |       | 0.93                | 107.2     | 19.01             | 0.6   | 0.26  | <10      |
| KRSE4-3 ROV HYD 2A                 | <0.01   | <0.01                              |        |       | 0.13                | 100.35    | 7.63              | 0.05  | 0.04  | <10      |
| KRSE4-3 ROV HYD 2B                 | <0.01   | <0.01                              |        |       | 0.51                | 101.2     | 20.7              | 2.1   | 0.15  | 20       |
| KRSE4-3 ROV HYD 1A                 | 0.02    | <0.01                              |        |       | 0.55                | 101.75    | 13.19             | 0.14  | 0.12  | <10      |
| KRSE4-3 ROV HYD 1B                 | 0.01    | <0.01                              |        |       | 0.47                | 103.15    | 13.09             | 0.09  | 0.14  | <10      |
| KRSE4-4 ROV HYD 2                  | 0.17    | <0.01                              |        |       | 0.36                | 102.2     | 18.72             | 1.61  | 0.1   | 70       |
| KRSE4-4 ROV HYD XA                 | <0.01   | <0.01                              |        |       | 0.27                | 101.75    | 10.21             | 0.07  | 0.08  | 10       |
| KRSE4-4 ROV HYD XB                 | 0.13    | <0.01                              |        |       | 0.44                | 100.7     | 25.97             | 3.44  | 0.1   | 150      |
| KRSE4-4 ROV HYD XC                 | <0.01   | <0.01                              |        |       | 0.22                | 101.55    | 8.86              | 0.06  | 0.05  | 10       |
| KRSE4-7 ROV HYD 2A                 | 0.04    | <0.01                              |        |       | 0.55                | 106.95    | 20.89             | 0.22  | 0.15  | 110      |
| KRSE4-7 ROV HYD 2B                 | <0.01   | <0.01                              |        |       | 0.82                | 106.35    | 18.51             | 0.29  | 0.19  | <10      |
| HT22-1 ROV 1                       | 0.04    | <0.01                              |        |       | 0.25                | 102.5     | 12.68             | 0.12  | 0.05  | 60       |
| HT22-2 ROV 1                       | 0.02    | <0.01                              |        |       | 0.44                | 101.65    | 16.98             | 1.52  | 0.14  | 10       |
|                                    |         |                                    |        |       |                     |           |                   |       |       |          |
| <b>Nod-P-1 Standard</b>            | 0.3     | <0.01                              |        |       | 0.19                | 98        | 14.66             | 0.25  | 0.04  | 150      |
|                                    |         |                                    |        |       |                     |           |                   |       |       |          |
| HT22-2 ROV 2A                      |         |                                    | 0.02   | 0.08  | 0.31                | 100.27    |                   |       |       |          |
| HT22-2 ROV 2B                      |         |                                    | 0.02   | 0.05  | 0.29                | 99.94     |                   |       |       |          |
| HT22-2 ROV 2C                      |         |                                    | 0.02   | 0.08  | 0.30                | 99.42     |                   |       |       |          |
|                                    |         |                                    |        |       |                     |           |                   |       |       |          |
| <b>Average Red Sea</b>             |         |                                    | 0.03   |       |                     |           |                   |       |       |          |
| <i>StDev Red Sea</i>               |         |                                    | 0.03   |       |                     |           |                   |       |       |          |
| <b>Average Hatiba-Hadarba Deep</b> |         |                                    | 0.04   |       |                     |           |                   |       |       |          |
| <i>StDev Hatiba-Hadarba Deep</i>   |         |                                    | 0.03   |       |                     |           |                   |       |       |          |

**Supplementary Table 2: Mineralogy and Chemistry (continued)**

| <b>Sample name</b>      | <b>Sc (ppm)</b> | <b>V (ppm)</b> | <b>Cr (ppm)</b> | <b>Co (ppm)</b> | <b>Ni (ppm)</b> | <b>Cu (ppm)</b> | <b>Zn (ppm)</b> | <b>Ga (ppm)</b> | <b>Ge (ppm)</b> | <b>As (ppm)</b> |
|-------------------------|-----------------|----------------|-----------------|-----------------|-----------------|-----------------|-----------------|-----------------|-----------------|-----------------|
| KRSE4-3 ROV HYD 1       | 0.4             | 147            | <5              | 3               | 2               | 2               | 21              | 0.9             | 5               | 126             |
| KRSE4-3 ROV HYD 2A      | 0.2             | 6              | <5              | 1               | 2               | <1              | 9               | 0.3             | 11.6            | 9.6             |
| KRSE4-3 ROV HYD 2B      | 1.2             | 215            | 6               | 4               | 14              | 6               | 53              | 2.2             | 3.1             | 136.5           |
| KRSE4-3 ROV HYD 1A      | 0.6             | 203            | 5               | 33              | 39              | 11              | 149             | 2.3             | 4.2             | 139             |
| KRSE4-3 ROV HYD 1B      | 1.5             | 114            | 8               | 24              | 13              | 11              | 129             | 2.3             | 3.9             | 68.9            |
| KRSE4-4 ROV HYD 2       | 6.5             | 96             | 17              | 38              | 65              | 35              | 163             | 11.4            | 1               | 48.3            |
| KRSE4-4 ROV HYD XA      | 0.5             | 18             | <5              | 3               | 3               | 2               | 473             | 0.9             | 12              | 205             |
| KRSE4-4 ROV HYD XB      | 0.8             | 108            | <5              | 26              | 120             | 37              | 417             | 13              | 0.5             | 87.8            |
| KRSE4-4 ROV HYD XC      | 0.2             | 11             | <5              | 1               | 3               | <1              | 329             | 1.1             | 29.5            | 192.5           |
| KRSE4-7 ROV HYD 2A      | 0.7             | 27             | <5              | 12              | 23              | 4               | 472             | 10.3            | 4.3             | >250            |
| KRSE4-7 ROV HYD 2B      | 0.5             | 12             | <5              | 4               | 2               | 2               | 239             | 1.1             | 7               | >250            |
| HT22-1 ROV 1            | 0.5             | 33             | 7               | 2               | 15              | 6               | 44              | 7.3             | 57              | 20.6            |
| HT22-2 ROV 1            | 0.9             | 289            | 7               | 32              | 23              | 9               | 1220            | 2.7             | 20.5            | 215             |
|                         |                 |                |                 |                 |                 |                 |                 |                 |                 |                 |
| <b>Nod-P-1 Standard</b> | 8.8             | 488            | 19              | 2200            | >10000          | >10000          | 1490            | 40.2            | 1.6             | 79.9            |

**Supplementary Table 2: Mineralogy and Chemistry (*continued*)**

| <b>Sample name</b>        | <b>Se (ppm)</b> | <b>Rb (ppm)</b> | <b>Sr (ppm)</b> | <b>Y (ppm)</b> | <b>Zr (ppm)</b> | <b>Nb (ppm)</b> | <b>Mo (ppm)</b> | <b>Ag (ppm)</b> | <b>La (ppm)</b> | <b>Ce (ppm)</b> |
|---------------------------|-----------------|-----------------|-----------------|----------------|-----------------|-----------------|-----------------|-----------------|-----------------|-----------------|
| <b>KRSE4-3 ROV HYD 1</b>  | 0.6             | 1.4             | 234             | 14.3           | 2               | 0.17            | 48              | <0.5            | 1.6             | 4               |
| <b>KRSE4-3 ROV HYD 2A</b> | <0.2            | 43.8            | 69.3            | 6.9            | 1               | <0.05           | 1               | <0.5            | 0.6             | 1.2             |
| <b>KRSE4-3 ROV HYD 2B</b> | 0.6             | 2               | 1630            | 10.1           | 6               | 0.34            | 18              | <0.5            | 1.5             | 2.8             |
| <b>KRSE4-3 ROV HYD 1A</b> | 0.7             | 1.6             | 135.5           | 40.5           | 4               | 0.07            | 147             | <0.5            | 8.2             | 16.5            |
| <b>KRSE4-3 ROV HYD 1B</b> | 0.3             | 2.8             | 80.2            | 36.9           | 12              | 0.73            | 115             | <0.5            | 7               | 13.3            |
| <b>KRSE4-4 ROV HYD 2</b>  | 0.2             | 14.4            | 665             | 7.2            | 20              | 0.91            | 108             | <0.5            | 1.9             | 3.9             |
| <b>KRSE4-4 ROV HYD XA</b> | <0.2            | 30.5            | 109             | 6              | 1               | <0.05           | 4               | <0.5            | 0.7             | 1.5             |
| <b>KRSE4-4 ROV HYD XB</b> | 0.2             | 5.2             | 1225            | 3.8            | 11              | 0.52            | 175             | <0.5            | 1.4             | 2.1             |
| <b>KRSE4-4 ROV HYD XC</b> | <0.2            | 46.4            | 91.5            | 6.6            | 2               | <0.05           | 1               | <0.5            | 0.6             | 1.1             |
| <b>KRSE4-7 ROV HYD 2A</b> | 0.3             | 3.9             | 320             | 5.3            | 4               | 0.27            | 227             | <0.5            | 0.8             | 1.4             |
| <b>KRSE4-7 ROV HYD 2B</b> | 0.2             | 3.6             | 237             | 4.1            | 2               | 0.19            | 11              | <0.5            | 0.4             | 0.8             |
| <b>HT22-1 ROV 1</b>       | <0.2            | 23.7            | 207             | 3.7            | 10              | 0.48            | 173             | <0.5            | 1.1             | 2.3             |
| <b>HT22-2 ROV 1</b>       | 0.8             | 7.8             | 360             | 17.8           | 5               | 0.14            | 105             | <0.5            | 2.2             | 3.7             |
|                           |                 |                 |                 |                |                 |                 |                 |                 |                 |                 |
| <b>Nod-P-1 Standard</b>   | 0.8             | 23.9            | 637             | 92.4           | 269             | 20.5            | 555             | <0.5            | 111.5           | 327             |

**Supplementary Table 2: Mineralogy and Chemistry (*continued*)**

| <b>Sample name</b>      | <b>Cd (ppm)</b> | <b>In (ppm)</b> | <b>Sn (ppm)</b> | <b>Sb (ppm)</b> | <b>Te (ppm)</b> | <b>Cs (ppm)</b> | <b>Ba (ppm)</b> | <b>Pr (ppm)</b> | <b>Nd (ppm)</b> |
|-------------------------|-----------------|-----------------|-----------------|-----------------|-----------------|-----------------|-----------------|-----------------|-----------------|
| KRSE4-3 ROV HYD 1       | 1               | <0.005          | <0.5            | 2.28            | 0.02            | 0.02            | 54.1            | 0.54            | 3.3             |
| KRSE4-3 ROV HYD 2A      | 0.5             | <0.005          | <0.5            | 0.29            | <0.01           | 2.19            | 26.7            | 0.18            | 1.2             |
| KRSE4-3 ROV HYD 2B      | 1.4             | <0.005          | <0.5            | 4.37            | 0.04            | 0.09            | 87.4            | 0.48            | 2.2             |
| KRSE4-3 ROV HYD 1A      | 0.8             | <0.005          | <0.5            | 4.36            | 0.06            | 0.02            | 253             | 1.38            | 6.9             |
| KRSE4-3 ROV HYD 1B      | 0.6             | <0.005          | <0.5            | 2.33            | 0.02            | 0.14            | 145.5           | 1.26            | 6.5             |
| KRSE4-4 ROV HYD 2       | 0.5             | 0.012           | <0.5            | 5.18            | 0.09            | 0.59            | 1740            | 0.53            | 2.9             |
| KRSE4-4 ROV HYD XA      | 0.7             | <0.005          | <0.5            | 1.4             | <0.01           | 2.12            | 35.9            | 0.2             | 1               |
| KRSE4-4 ROV HYD XB      | 1.1             | <0.005          | <0.5            | 21.9            | 0.11            | 0.13            | 1140            | 0.25            | 1.4             |
| KRSE4-4 ROV HYD XC      | 0.6             | <0.005          | <0.5            | 1.29            | <0.01           | 3.12            | 16.3            | 0.17            | 1.1             |
| KRSE4-7 ROV HYD 2A      | 0.8             | <0.005          | <0.5            | 4.93            | 0.02            | 0.1             | 307             | 0.16            | 0.9             |
| KRSE4-7 ROV HYD 2B      | 0.8             | <0.005          | <0.5            | 0.24            | 0.02            | 0.18            | 75.5            | 0.07            | 0.5             |
| HT22-1 ROV 1            | <0.5            | <0.005          | <0.5            | 2.21            | 0.03            | 0.56            | 427             | 0.32            | 1.3             |
| HT22-2 ROV 1            | 1.2             | <0.005          | <0.5            | 5.96            | 0.03            | 0.2             | 197.5           | 0.52            | 2               |
|                         |                 |                 |                 |                 |                 |                 |                 |                 |                 |
| <b>Nod-P-1 Standard</b> | 19.7            | 0.097           | 2.5             | 41.6            | 4.79            | 1.66            | 2480            | 32.4            | 143             |

**Supplementary Table 2: Mineralogy and Chemistry (*continued*)**

| <b>Sample name</b>        | <b>Sm (ppm)</b> | <b>Eu (ppm)</b> | <b>Gd (ppm)</b> | <b>Tb (ppm)</b> | <b>Dy (ppm)</b> | <b>Ho (ppm)</b> | <b>Er (ppm)</b> | <b>Tm (ppm)</b> | <b>Yb (ppm)</b> | <b>Lu (ppm)</b> |
|---------------------------|-----------------|-----------------|-----------------|-----------------|-----------------|-----------------|-----------------|-----------------|-----------------|-----------------|
| <b>KRSE4-3 ROV HYD 1</b>  | 0.66            | 0.24            | 1.49            | 0.21            | 1.7             | 0.36            | 1.02            | 0.14            | 0.8             | 0.17            |
| <b>KRSE4-3 ROV HYD 2A</b> | 0.31            | 0.11            | 0.45            | 0.11            | 0.57            | 0.13            | 0.5             | 0.1             | 0.32            | 0.07            |
| <b>KRSE4-3 ROV HYD 2B</b> | 0.4             | 0.12            | 0.89            | 0.16            | 0.94            | 0.22            | 0.75            | 0.12            | 0.6             | 0.12            |
| <b>KRSE4-3 ROV HYD 1A</b> | 1.06            | 0.29            | 2.73            | 0.3             | 1.78            | 0.5             | 1.48            | 0.17            | 0.68            | 0.14            |
| <b>KRSE4-3 ROV HYD 1B</b> | 0.94            | 0.35            | 2.65            | 0.3             | 1.92            | 0.5             | 1.36            | 0.15            | 0.74            | 0.15            |
| <b>KRSE4-4 ROV HYD 2</b>  | 0.73            | 0.21            | 1.04            | 0.16            | 1.16            | 0.26            | 0.73            | 0.12            | 0.67            | 0.11            |
| <b>KRSE4-4 ROV HYD XA</b> | 0.25            | 0.08            | 0.32            | 0.07            | 0.49            | 0.11            | 0.4             | 0.05            | 0.23            | 0.05            |
| <b>KRSE4-4 ROV HYD XB</b> | 0.19            | 0.1             | 0.35            | 0.04            | 0.33            | 0.06            | 0.32            | 0.04            | 0.2             | 0.06            |
| <b>KRSE4-4 ROV HYD XC</b> | 0.3             | 0.1             | 0.55            | 0.1             | 0.62            | 0.16            | 0.45            | 0.07            | 0.31            | 0.02            |
| <b>KRSE4-7 ROV HYD 2A</b> | 0.36            | 0.07            | 0.27            | 0.05            | 0.47            | 0.1             | 0.32            | 0.06            | 0.33            | 0.06            |
| <b>KRSE4-7 ROV HYD 2B</b> | 0.08            | 0.03            | 0.08            | 0.02            | 0.14            | 0.04            | 0.19            | 0.03            | 0.15            | 0.03            |
| <b>HT22-1 ROV 1</b>       | 0.19            | 0.09            | 0.34            | 0.05            | 0.3             | 0.05            | 0.26            | 0.02            | 0.16            | 0.02            |
| <b>HT22-2 ROV 1</b>       | 0.59            | 0.27            | 1.42            | 0.19            | 1.28            | 0.32            | 1.02            | 0.13            | 0.5             | 0.12            |
|                           |                 |                 |                 |                 |                 |                 |                 |                 |                 |                 |
| <b>Nod-P-1 Standard</b>   | 34.3            | 6.81            | 30.4            | 4.76            | 25.8            | 4.76            | 13.55           | 1.96            | 12.25           | 2.06            |

**Supplementary Table 2: Mineralogy and Chemistry (*continued*)**

| <b>Sample name</b>        | <b>Hf (ppm)</b> | <b>Ta (ppm)</b> | <b>W (ppm)</b> | <b>Re (ppm)</b> | <b>Hg (ppm)</b> | <b>Tl (ppm)</b> | <b>Pb (ppm)</b> | <b>Bi (ppm)</b> | <b>Th (ppm)</b> | <b>U (ppm)</b> |
|---------------------------|-----------------|-----------------|----------------|-----------------|-----------------|-----------------|-----------------|-----------------|-----------------|----------------|
| <b>KRSE4-3 ROV HYD 1</b>  | 0.11            | 0.1             | 0.7            | <0.001          | 0.017           | 0.15            | <2              | <0.01           | 0.06            | 6.53           |
| <b>KRSE4-3 ROV HYD 2A</b> | 0.05            | 0.1             | 0.6            | <0.001          | 0.011           | <0.02           | <2              | <0.01           | <0.05           | 0.12           |
| <b>KRSE4-3 ROV HYD 2B</b> | 0.17            | 0.1             | 0.9            | <0.001          | 0.022           | 0.5             | 4               | <0.01           | 0.11            | 2.63           |
| <b>KRSE4-3 ROV HYD 1A</b> | 0.13            | 0.1             | 0.6            | <0.001          | 0.009           | 1.6             | 4               | <0.01           | <0.05           | 8.48           |
| <b>KRSE4-3 ROV HYD 1B</b> | 0.4             | 0.1             | <0.5           | <0.001          | 0.007           | 0.55            | 3               | 0.01            | 0.28            | 8.47           |
| <b>KRSE4-4 ROV HYD 2</b>  | 0.69            | 0.1             | 4.9            | <0.001          | 0.012           | 4.19            | 25              | 0.01            | 0.3             | 1.2            |
| <b>KRSE4-4 ROV HYD XA</b> | 0.09            | 0.1             | <0.5           | 0.001           | 0.44            | 0.2             | 107             | <0.01           | <0.05           | 0.72           |
| <b>KRSE4-4 ROV HYD XB</b> | 0.35            | 0.1             | 5.1            | <0.001          | 0.015           | 12.25           | 30              | 0.01            | 0.18            | 1.57           |
| <b>KRSE4-4 ROV HYD XC</b> | 0.1             | 0.1             | <0.5           | <0.001          | 0.047           | 0.47            | 24              | <0.01           | <0.05           | 0.45           |
| <b>KRSE4-7 ROV HYD 2A</b> | 0.17            | 0.1             | 1.3            | <0.001          | 0.023           | 11.35           | 27              | <0.01           | 0.08            | 1.51           |
| <b>KRSE4-7 ROV HYD 2B</b> | 0.12            | 0.1             | 0.6            | <0.001          | 0.027           | 0.22            | <2              | <0.01           | 0.08            | 1.13           |
| <b>HT22-1 ROV 1</b>       | 0.27            | 0.1             | 1.7            | <0.001          | 0.01            | 0.38            | 25              | <0.01           | 0.16            | 0.85           |
| <b>HT22-2 ROV 1</b>       | 0.11            | 0.1             | 1.4            | <0.001          | 0.02            | 6.37            | 6               | <0.01           | 0.09            | 6.49           |
|                           |                 |                 |                |                 |                 |                 |                 |                 |                 |                |
| <b>Nod-P-1 Standard</b>   | 4.12            | 0.4             | 59.5           | <0.001          | 0.053           | 186             | 482             | 4.68            | 15.15           | 3.97           |

**Supplementary Table 3: Hydrothermal vent field comparisons**

|            | Rift                      | Location                                              | Full Spreading Rate*    | Depth (mbsl) | Nr. of Fields                                                                                                     | Dimensions                                                                                                                                                                                                                          | Total Area (m <sup>2</sup> ) |
|------------|---------------------------|-------------------------------------------------------|-------------------------|--------------|-------------------------------------------------------------------------------------------------------------------|-------------------------------------------------------------------------------------------------------------------------------------------------------------------------------------------------------------------------------------|------------------------------|
| ultra-slow | <b>Red Sea Rift</b>       | Hatiba Mons fields                                    | ultra-slow, 12 mm/yr    | 840 - 1020   | 45 fields mapped (14 confirmed) within a survey area about 55 km <sup>2</sup> (deposit covers ≈3% of survey area) | from ≈50m up to >1000m across                                                                                                                                                                                                       | 1,587,054                    |
|            | <b>Mohns Ridge</b>        | Trollveggen (Troll Wall)                              | ultra-slow, <15 mm/yr   | 550 - 600    | 3 fields/areas<br>high-T area at 550m depth<br>low-T area at 600m depth<br>extinct area at 460m depth             | area with high-T venting and extinct field about 1000x200m <sup>**</sup> ;<br>numerous Fe-mounds spread over an area of about 900x200m <sup>**</sup> ;<br>extinct area nearby with comparable sizes of the low-T area <sup>**</sup> | 560,000                      |
|            | <b>SW Indian Ridge</b>    | 37°47'S 49°39'E, west of the Gallieni transform fault | ultra-slow, 14-16 mm/yr | 2750         | na                                                                                                                | na                                                                                                                                                                                                                                  | na                           |
|            | <b>Gulf of Aden</b>       | Westernmost GoA at 11°58'N 43°40'E                    | ultra-slow, 16 mm/yr    | ≈1400        | na                                                                                                                | na                                                                                                                                                                                                                                  | na                           |
| slow       | <b>Mid-Atlantic Ridge</b> | TAG hydrothermal field                                | slow, 26 mm/yr          | 3400 - 3600  | 11 sites within a survey area of about 46km <sup>2</sup>                                                          | 60m to 400m across                                                                                                                                                                                                                  | 454,256                      |
|            | <b>Woodlark Basin</b>     | Western WB, Franklin Seamount                         | slow, 27 mm/yr          | 2160 - 2360  | 3 areas indicated                                                                                                 | 300x100m to 1700x200m <sup>**</sup>                                                                                                                                                                                                 | 495,560                      |



**Supplementary Table 3: Hydrothermal vent field comparisons (continued)**

|            | Rift                      | Mound Sizes                                                                                             | activity, fluid T                                                      | Description                                                                                                                                                                                                                                                                                                                                                                                                                                                             | References                                                                  |
|------------|---------------------------|---------------------------------------------------------------------------------------------------------|------------------------------------------------------------------------|-------------------------------------------------------------------------------------------------------------------------------------------------------------------------------------------------------------------------------------------------------------------------------------------------------------------------------------------------------------------------------------------------------------------------------------------------------------------------|-----------------------------------------------------------------------------|
| ultra-slow | <b>Red Sea Rift</b>       | avg 3m, max 12m high, max 15-20m basal diameter, deposit thickness ≈5m                                  | active, 39.4°C<br>(in Farwah Saffraa field, ambient seawater T 21.7°C) | see main text                                                                                                                                                                                                                                                                                                                                                                                                                                                           | this study                                                                  |
|            | <b>Mohns Ridge</b>        | up to "several-m-high", 2-3m**, "<0.5 m to several m across", up to 10m**                               | active, max 270°C venting; 7°C within Fe-mound (ambient -0.4°C)        | high-T venting along a 1km long fault at 10 high-T vent sites; diffuse low-T hydrothermal fluids but no shimmering water, siliceous Fe-deposits with Fe-mounds composed of laminated yellow to brown amorphous FeOOH, local black oxidized Mn-phases, mounds vary in shape from thin flat-lying mats to higher mounds with chimney-like edifices; stratified mound structure of millimeters- to centimeters-thick laminated resembling microtextures of biogenic origin | Pedersen et al., 2010 <sup>4</sup><br>Johannessen et al., 2017 <sup>5</sup> |
|            | <b>SW Indian Ridge</b>    | na                                                                                                      | active, "warm"                                                         | southern rift flank, low-T silica rich FeOOH samples collected with TV-grab from 2750m depth, no high-T precipitates                                                                                                                                                                                                                                                                                                                                                    | Peng et al., 2011 <sup>6</sup>                                              |
|            | <b>Gulf of Aden</b>       | na                                                                                                      | active, T-anomaly in water column 0.5°C                                | southern rift flank, "extensive" areas of diffuse low-T venting, FeOOH precipitates, no high-T venting, no or sulfides; no faunal aggregations around vent opening                                                                                                                                                                                                                                                                                                      | Choukroune et al., 1988 <sup>7</sup><br>Juniper et al., 1990 <sup>8</sup>   |
| slow       | <b>Mid-Atlantic Ridge</b> | Fe-oxides on Mound 11: up to 5m, Shimmering mound (low-T sulfides): ≈20m; Shinkai mound (sulfides): 70m | active, max 360°C                                                      | sulfide abundant, Fe-oxides precipitates is limited                                                                                                                                                                                                                                                                                                                                                                                                                     | Graber et al., 2020 <sup>1</sup>                                            |
|            | <b>Woodlark Basin</b>     | avg 1.5-2m, max 7m high, max 8-10m basal diameter                                                       | active, 20-30°C                                                        | basaltic andesite volcano, deposits at 2143–2366 m water depth, numerous actively venting oxyhydroxide chimneys and mounds                                                                                                                                                                                                                                                                                                                                              | Lisitsyn et al., 1991 <sup>9</sup><br>Boyd and Scott, 2001 <sup>10</sup>    |

**Supplementary Table 3: Hydrothermal vent field comparisons (continued)**

|              |                                        |                                         |                        |                                                                             |                                                                                         |                                                                                                  |           |
|--------------|----------------------------------------|-----------------------------------------|------------------------|-----------------------------------------------------------------------------|-----------------------------------------------------------------------------------------|--------------------------------------------------------------------------------------------------|-----------|
| slow         | Lau Basin                              | Valu Fa Ridge sites                     | slow, 30 mm/yr         | Hine Hina sites<br>≈1850<br>Vai Lilli field ≈1700<br>Mariner Field<br>≈1900 | 4 sampling sites                                                                        | 3 sites, km away<br>Hine Hina, two sites of ≈250m<br>Vai Lili field ≈500m<br>Mariner Field ≈100m | 325,940   |
|              | Mid-Atlantic Ridge                     | S-MAR ner 9°33'S,<br>Liliput vent field | slow, 33 mm/yr         | 1500                                                                        | 1                                                                                       | numerous Fe-oxide occurrences spread<br>over 1000x250m                                           | 250,000   |
| intermediate | Juan de Fuca Ridge                     | Axial Seamount                          | intermediate, 60 mm/yr | 1500                                                                        | 6 fields                                                                                | na                                                                                               | na        |
|              | Galapagos<br>Spreading Center,<br>86°W | Mounds Abyssal<br>Hydrothermal Field    | intermediate, 63 mm/yr | 2700                                                                        | >60 ridges within a survey<br>area >220km <sup>2</sup> (deposits<br>≈1% of survey area) | ridges are 20-50m wide,<br>combined length ≈88km**                                               | 2,205,525 |
|              | East Pacific Rise,<br>21°N             | Red Seamount                            | intermediate, 63 mm/yr | 1900 - 2400                                                                 | 6 fields                                                                                | 300x200m to 800x350m**                                                                           | 616,541   |
| fast         | East Pacific Rise,<br>13°N             | Seamount 5                              | fast, 91 mm/yr         | 1000 - 1200                                                                 | 4 fields                                                                                | 170m to 300x200m**                                                                               | 122,836   |

Notes

fast >80 mm/a, intermediate 50-80 mm/a, slow 20-50 mm/a, ultraslow <20 mm/a; after LaFemina (2015)<sup>18</sup>

\*full spreading rates from Argus et al. (2011)<sup>19</sup>, DeMets et al. (1994)<sup>20</sup>

\*\*read from the given maps and figures

**Supplementary Table 3: Hydrothermal vent field comparisons (continued)**

|              |                                         |                                                                |                                              |                                                                                                                                                                                                                                                                                                                                                                                              |                                                                                                 |
|--------------|-----------------------------------------|----------------------------------------------------------------|----------------------------------------------|----------------------------------------------------------------------------------------------------------------------------------------------------------------------------------------------------------------------------------------------------------------------------------------------------------------------------------------------------------------------------------------------|-------------------------------------------------------------------------------------------------|
| slow         | <b>Lau Basin</b>                        | na                                                             | active, ≈40°C (Hine Hina)                    | Fe–Mn–Si oxide samples recovered with TV-grab at the Hine Hina (diffuse venting at 40°C), the Vai Lili and the Mariner hydrothermal field, Vai Lili black smokers and diffuse discharge, maximum temperature of one TVG sample (Mariner field) was 37.7 °C, deposits formed either as the result of direct from Fe-oxidizing bacteria or of the passive reactions on the surface of microbes | Fouquet 1989 <sup>11</sup><br>Takai et al. 2008 <sup>12</sup><br>Sun et al., 2011 <sup>13</sup> |
|              | <b>Mid-Atlantic Ridge</b>               | na, more crusts and sediments instead of individual mounds     | active, 4.8-15.8°C                           | 4 main sites (Lustrog, Main Liliput, Limtoc, Roman City) along the eastern flank of an axial volcanic ridge, diffuse venting, fauna visually dominated by small mussels and sponges, Main Lilliput site consists of abundant semi-lithified FeOOH crusts and cm-thick orange (rarely greenish) FeOOH precipitates around the sites                                                           | Haase et al., 2009 <sup>14</sup>                                                                |
| intermediate | <b>Juan de Fuca Ridge</b>               | ~0.1–0.5 m                                                     | na                                           | sulfide abundant, Fe-oxides precipitates is limited, iron-oxide deposits are mound-like accretions to widespread blanket-type deposits in an average water depth of 1,500 m                                                                                                                                                                                                                  | Kennedy et al., 2003 <sup>15</sup>                                                              |
|              | <b>Galapagos Spreading Center, 86°W</b> | high                                                           | na                                           | elongated ridges 20-30km south of-axis at GSC 86°W, conical in section and generally elongate in plan, encrusted with thick deposits of manganese oxide, occur in several patches, mound chains oriented parallel to the rift and fault-block terrain                                                                                                                                        | Lonsdale, 1977 <sup>16</sup>                                                                    |
|              | <b>East Pacific Rise, 21°N</b>          | mounds up to 1m,, deposit thickness estimated to be about 1m   | active, 10-15°C                              | seamount located on 0.6Ma old crust, near 21°N EPR, iron oxide deposits over several low pillow cones, as patches on caldera floor and summit, small dm scaled mounds and chimneys, hollow linear Fe-Mn crust ridges with FeMn oxides and Nontronite                                                                                                                                         | Alt et al., 1988 <sup>17</sup>                                                                  |
| fast         | <b>East Pacific Rise, 13°N</b>          | mounds up to 1m, deposit thickness estimated to be at least 1m | inactive?, T 2°C above ambient in 50cm depth | seamount located on 0.9Ma old crust, 86km east of the EPR near 13°N, hydrothermal iron deposits form continuous fields up to 700m <sup>2</sup> , orange to yellow knobby mounds with hollow cm scaled chimneys, mounds often aligned in rows, no fluid flow observed                                                                                                                         | Alt et al., 1988 <sup>17</sup>                                                                  |

**Supplementary Table 4: Hatiba Mons hydrothermal field details**

| Hydrothermal Field                 | central lat (°N) | central lon (°E) | average depth (m) | location on Hatiba Mons                       | max. dimensions (width x length) | total area (m <sup>2</sup> ) | average total thickness* | average mound height (AUV grid) |
|------------------------------------|------------------|------------------|-------------------|-----------------------------------------------|----------------------------------|------------------------------|--------------------------|---------------------------------|
| <b>Majarrah Mounds</b>             | 22.280           | 37.841           | 965               | central valley                                | 900m x 690m                      | 417,817                      | 8ms twt, 6.4m            | 3.8m (n=67)                     |
| <b>Kabir Field</b>                 | 22.267           | 37.849           | 950               | central valley                                | 1040m x 550m                     | 308,775                      | 6ms twt, 4.8m            | 3.7m (n=20)                     |
| <b>Farwah Safraa ridges</b>        |                  |                  |                   | W-fault zone                                  |                                  | 325,416                      | n.d.                     | 3.4m (n=67)                     |
| <b>North Farwah Safraa ridges</b>  | 22.259           | 37.839           | 860               | W-fault zone, NE Vallis Occidentalis          | 770m x 200m                      | -                            | -                        | -                               |
| <b>South Farwah Safraa ridges</b>  | 22.254           | 37.847           | 875               | W-fault zone, W-Platform                      | 895m x 660m                      | -                            | -                        | -                               |
| <b>Baja'ah Mounds</b>              | 22.263           | 37.862           | 1010              | central valley                                | 510m x 330m                      | 80,315                       | 8ms twt, 6.4m            | 3.0m (n=35)                     |
| <b>Beacon Field</b>                | 22.277           | 37.865           | 860               | NE Platform, SW shoulder of Vallis Orientalis | 280m x 280m                      | 57,353                       | 7ms twt, 5.6m            | 4.8m (n=26)                     |
| <b>Field 6</b>                     | 22.247           | 37.849           | 890               | east shoulder of Vallis Occidentalis          | 290m x 180m                      | 35,289                       | n.d.                     | 3.6m (n=11)                     |
| <b>Field 7</b>                     | 22.284           | 37.851           | 950               | central valley                                | 210m x 180m                      | 27,614                       | n.d.                     | 2.2m (n=25)                     |
| <b>Field 8</b>                     | 22.261           | 37.854           | 950               | central valley                                | 200m x 100m                      | 16,897                       | n.d.                     | 2.7m (n=10)                     |
| <b>Field 9</b>                     | 22.270           | 37.852           | 970               | central valley                                | 170m x 110m                      | 14,827                       | n.d.                     | 1.9m (n=4)                      |
| <b>Field 10</b>                    | 22.271           | 37.851           | 970               | central valley                                | 90m x 60m                        | 4,584                        | n.d.                     | 2.3m (n=9)                      |
| <b>Field 11</b>                    | 22.258           | 37.855           | 965               | central valley                                | 80m x 40m                        | 2,837                        | n.d.                     | <1m                             |
| <b>Field 12</b>                    | 22.289           | 37.857           | 886               | rim of NE Platform                            | 100m x 180m                      | 8,303                        | n.d.                     | 2.3m (n=14)                     |
| <b>Field 13</b>                    | 22.291           | 37.858           | 875               | rim of NE Platform                            | 140m x 230m                      | 24,571                       | n.d.                     | 2.5m (n=21)                     |
| <b>Field 14</b>                    | 22.289           | 37.856           | 890               | rim of NE Platform                            | 55m x 75m                        | 3,565                        | n.d.                     | 3.2m (n=9)                      |
| <b>Inferred fields (AUV, n=31)</b> |                  |                  |                   |                                               |                                  | 258,889                      | n.d.                     |                                 |
| <b>Total</b>                       |                  |                  |                   |                                               |                                  | <b>1,587,054</b>             |                          |                                 |

\* based on AUV sub-bottom profile data, calculated at 1600m/s

\*\* based on average thickness of the hydrothermal field of 3m as indicated by AUV sub-bottom data

\*\*\* estimated from ROV video footage

Supplementary Table 4: Hatiba Mons hydrothermal field details (*continued*)

| Hydrothermal Field                 | max. mound height (AUV grid) | volume of hydrothermal deposit** (m <sup>3</sup> ) | appearance and major types of microbial mats | abundance of microbial mats on individual mounds (%)*** | abundance of microbial mats in the entire field (%)*** |
|------------------------------------|------------------------------|----------------------------------------------------|----------------------------------------------|---------------------------------------------------------|--------------------------------------------------------|
| <b>Majarrah Mounds</b>             | 12m                          | 2,423,338                                          | 2B, 3A, 3B, 4                                | <20%                                                    | ≈10%                                                   |
| <b>Kabir Field</b>                 | 6m                           | 1,790,893                                          | 1B, 2B, 3A, 3B, 4                            | <40%                                                    | ≈5%                                                    |
| <b>Farwah Safraa ridges</b>        | 10m                          | 1,887,414                                          |                                              |                                                         |                                                        |
| <i>North Farwah Safraa ridges</i>  | -                            | -                                                  | 1A, 2A, 2B, 3A                               | <5%                                                     | <1%                                                    |
| <i>South Farwah Safraa ridges</i>  | -                            | -                                                  | 1A, 2A, 2B, 3B                               | up to 100%                                              | ≈20%                                                   |
| <b>Baja'ah Mounds</b>              | 8m                           | 465,826                                            | 1B                                           | <40%                                                    | ≈10%                                                   |
| <b>Beacon Field</b>                | 12m                          | 332,650                                            | 2B, 3B                                       | <5%                                                     | <1%                                                    |
| <b>Field 6</b>                     | 10m                          | 204,679                                            | 2A, 2B, 4                                    | <5%                                                     | ≈1%                                                    |
| <b>Field 7</b>                     | 4.5m                         | 160,163                                            | n.d.                                         | n.d.                                                    | n.d.                                                   |
| <b>Field 8</b>                     | 4.5m                         | 98,005                                             | 1B, 4                                        | <5%                                                     | <1%                                                    |
| <b>Field 9</b>                     | 3.5m                         | 85,999                                             | 1A, 1B                                       | <10%                                                    | ≈5%                                                    |
| <b>Field 10</b>                    | 3m                           | 26,589                                             | 1A, 1B                                       | <5%                                                     | ≈3%                                                    |
| <b>Field 11</b>                    | <1m                          | 16,453                                             | 1B, 3A, 3B                                   | <5%                                                     | <1%                                                    |
| <b>Field 12</b>                    | 4m                           | 48,157                                             | 1A                                           | 1%                                                      | <1%                                                    |
| <b>Field 13</b>                    | 10m                          | 142,513                                            | 1A                                           | <1%                                                     | <1%                                                    |
| <b>Field 14</b>                    | 6m                           | 20,678                                             | 1A, 1B, 2B                                   | <5%                                                     | <1%                                                    |
| <i>Inferred fields (AUV, n=31)</i> |                              | 1618212                                            |                                              |                                                         |                                                        |
| <b>Total</b>                       |                              | <b>9,321,569</b>                                   |                                              |                                                         |                                                        |

**Supplementary Table 5: Microbiological (NCBI) labels**

| <b>Original expedition sample name</b> | <b>NCBI SRA accession</b> | <b>Study</b> | <b>Bioproject_ accession</b> | <b>Biosample_ accession</b> | <b>Sample_name (NCBI SRA)</b> | <b>Library_ID</b>  |
|----------------------------------------|---------------------------|--------------|------------------------------|-----------------------------|-------------------------------|--------------------|
| KRSE4-2 ROV HYD                        | SRR22738876               | SRP413057    | PRJNA910929                  | SAMN32151258                | Dive_2_Sample_1               | Dive_2_Sample_1-R1 |
| KRSE4-2 ROV HYD                        |                           |              |                              |                             | Dive_2_Sample_1               | Dive_2_Sample_1-R2 |
| KRSE4-2 ROV HYD                        | SRR22738870               | SRP413057    | PRJNA910929                  | SAMN32151259                | Dive_2_Sample_2               | Dive_2_Sample_2-R1 |
| KRSE4-2 ROV HYD                        |                           |              |                              |                             | Dive_2_Sample_2               | Dive_2_Sample_2-R2 |
| KRSE4-2 ROV HYD                        | SRR22738859               | SRP413057    | PRJNA910929                  | SAMN32151260                | Dive_2_Sample_3               | Dive_2_Sample_3-R1 |
| KRSE4-2 ROV HYD                        |                           |              |                              |                             | Dive_2_Sample_3               | Dive_2_Sample_3-R2 |
| KRSE4-2 ROV HYD                        | SRR22738848               | SRP413057    | PRJNA910929                  | SAMN32151261                | Dive_2_Sample_4               | Dive_2_Sample_4_R1 |
| KRSE4-2 ROV HYD                        |                           |              |                              |                             | Dive_2_Sample_4               | Dive_2_Sample_4_R2 |
| KRSE4-2 ROV HYD                        | SRR22738836               | SRP413057    | PRJNA910929                  | SAMN32151262                | Dive_2_Sample_5               | Dive_2_Sample_5_R1 |
| KRSE4-2 ROV HYD                        |                           |              |                              |                             | Dive_2_Sample_5               | Dive_2_Sample_5_R2 |
| KRSE4-2 ROV HYD                        | SRR22738875               | SRP413057    | PRJNA910929                  | SAMN32151263                | Dive_2_Sample_6               | Dive_2_Sample_6_R1 |
| KRSE4-2 ROV HYD                        |                           |              |                              |                             | Dive_2_Sample_6               | Dive_2_Sample_6_R2 |
| KRSE4-2 ROV HYD                        | SRR22738874               | SRP413057    | PRJNA910929                  | SAMN32151264                | Dive_2_Sample_7               | Dive_2_Sample_7_R1 |
| KRSE4-2 ROV HYD                        |                           |              |                              |                             | Dive_2_Sample_7               | Dive_2_Sample_7_R2 |
| KRSE4-2 ROV HYD                        | SRR22738873               | SRP413057    | PRJNA910929                  | SAMN32151265                | Dive_2_Sample_8               | Dive_2_Sample_8_R1 |
| KRSE4-2 ROV HYD                        |                           |              |                              |                             | Dive_2_Sample_8               | Dive_2_Sample_8_R2 |
| KRSE4-2 ROV HYD                        | SRR22738872               | SRP413057    | PRJNA910929                  | SAMN32151266                | Dive_2_Sample_9               | Dive_2_Sample_9_R1 |
| KRSE4-2 ROV HYD                        |                           |              |                              |                             | Dive_2_Sample_9               | Dive_2_Sample_9_R2 |
| KRSE4-3 ROV SED 2                      | SRR22738871               | SRP413057    | PRJNA910929                  | SAMN32151267                | Dive_3_Sample_1               | Dive_3_Sample_1_R1 |
| KRSE4-3 ROV SED 2                      |                           |              |                              |                             | Dive_3_Sample_1               | Dive_3_Sample_1_R2 |
| KRSE4-3 ROV SED 2                      | SRR22738869               | SRP413057    | PRJNA910929                  | SAMN32151268                | Dive_3_Sample_2               | Dive_3_Sample_2_R1 |
| KRSE4-3 ROV SED 2                      |                           |              |                              |                             | Dive_3_Sample_2               | Dive_3_Sample_2_R2 |
| KRSE4-3 ROV SED 2                      | SRR22738868               | SRP413057    | PRJNA910929                  | SAMN32151269                | Dive_3_Sample_3               | Dive_3_Sample_3_R1 |
| KRSE4-3 ROV SED 2                      |                           |              |                              |                             | Dive_3_Sample_3               | Dive_3_Sample_3_R2 |
| KRSE4-3 ROV SED 1                      | SRR22738867               | SRP413057    | PRJNA910929                  | SAMN32151270                | Dive_3_Sample_4               | Dive_3_Sample_4_R1 |
| KRSE4-3 ROV SED 1                      |                           |              |                              |                             | Dive_3_Sample_4               | Dive_3_Sample_4_R2 |

**Supplementary Table 5: Microbiological (NCBI) labels (continued)**

| <b>Original expedition sample name</b> | <b>Title</b>                                 | <b>Filename</b>                           |
|----------------------------------------|----------------------------------------------|-------------------------------------------|
| KRSE4-2 ROV HYD                        | Dive 2_sample 1 = biological replicate 1     | Dive-2-Sample-1_S884_L002_R1_001.fastq.gz |
| KRSE4-2 ROV HYD                        | Dive 2_sample 1 = biological replicate 1     | Dive-2-Sample-1_S884_L002_R2_001.fastq.gz |
| KRSE4-2 ROV HYD                        | Dive 2_sample 1 = biological replicate 2     | Dive-2-Sample-2_S885_L002_R1_001.fastq.gz |
| KRSE4-2 ROV HYD                        | Dive 2_sample 1 = biological replicate 2     | Dive-2-Sample-2_S885_L002_R2_001.fastq.gz |
| KRSE4-2 ROV HYD                        | Dive 2_sample 1 = biological replicate 3     | Dive-2-Sample-3_S886_L002_R1_001.fastq.gz |
| KRSE4-2 ROV HYD                        | Dive 2_sample 1 = biological replicate 3     | Dive-2-Sample-3_S886_L002_R2_001.fastq.gz |
| KRSE4-2 ROV HYD                        | Dive 2_sample 2 = biological replicate 1     | Dive-2-Sample-4_S887_L002_R1_001.fastq.gz |
| KRSE4-2 ROV HYD                        | Dive 2_sample 2 = biological replicate 1     | Dive-2-Sample-4_S887_L002_R2_001.fastq.gz |
| KRSE4-2 ROV HYD                        | Dive 2_sample 2 = biological replicate 2     | Dive-2-Sample-5_S888_L002_R1_001.fastq.gz |
| KRSE4-2 ROV HYD                        | Dive 2_sample 2 = biological replicate 2     | Dive-2-Sample-5_S888_L002_R2_001.fastq.gz |
| KRSE4-2 ROV HYD                        | Dive 2_sample 2 = biological replicate 3     | Dive-2-Sample-6_S889_L002_R1_001.fastq.gz |
| KRSE4-2 ROV HYD                        | Dive 2_sample 2 = biological replicate 3     | Dive-2-Sample-6_S889_L002_R2_001.fastq.gz |
| KRSE4-2 ROV HYD                        | Dive 2_sample 3 = biological replicate 1     | Dive-2-Sample-7_S890_L002_R1_001.fastq.gz |
| KRSE4-2 ROV HYD                        | Dive 2_sample 3 = biological replicate 1     | Dive-2-Sample-7_S890_L002_R2_001.fastq.gz |
| KRSE4-2 ROV HYD                        | Dive 2_sample 3 = biological replicate 2     | Dive-2-Sample-8_S891_L002_R1_001.fastq.gz |
| KRSE4-2 ROV HYD                        | Dive 2_sample 3 = biological replicate 2     | Dive-2-Sample-8_S891_L002_R2_001.fastq.gz |
| KRSE4-2 ROV HYD                        | Dive 2_sample 3 = biological replicate 3     | Dive-2-Sample-9_S892_L002_R1_001.fastq.gz |
| KRSE4-2 ROV HYD                        | Dive 2_sample 3 = biological replicate 3     | Dive-2-Sample-9_S892_L002_R2_001.fastq.gz |
| KRSE4-3 ROV SED 2                      | Dive 3_mat_sample 1 = biological replicate 1 | Dive-3-Sample-1_S893_L002_R1_001.fastq.gz |
| KRSE4-3 ROV SED 2                      | Dive 3_mat_sample 1 = biological replicate 1 | Dive-3-Sample-1_S893_L002_R2_001.fastq.gz |
| KRSE4-3 ROV SED 2                      | Dive 3_mat_sample 1 = biological replicate 2 | Dive-3-Sample-2_S894_L002_R1_001.fastq.gz |
| KRSE4-3 ROV SED 2                      | Dive 3_mat_sample 1 = biological replicate 2 | Dive-3-Sample-2_S894_L002_R2_001.fastq.gz |
| KRSE4-3 ROV SED 2                      | Dive 3_mat_sample 1 = biological replicate 3 | Dive-3-Sample-3_S895_L002_R1_001.fastq.gz |
| KRSE4-3 ROV SED 2                      | Dive 3_mat_sample 1 = biological replicate 3 | Dive-3-Sample-3_S895_L002_R2_001.fastq.gz |
| KRSE4-3 ROV SED 1                      | Dive 3_mat_sample 2 = biological replicate 1 | Dive-3-Sample-4_S896_L002_R1_001.fastq.gz |
| KRSE4-3 ROV SED 1                      | Dive 3_mat_sample 2 = biological replicate 1 | Dive-3-Sample-4_S896_L002_R2_001.fastq.gz |

**Supplementary Table 5: Microbiological (NCBI) labels (*continued*)**

| <b>Original expedition sample name</b> | <b>NCBI SRA accession</b> | <b>Study</b> | <b>Bioproject accession</b> | <b>Biosample accession</b> | <b>Sample_name (NCBI SRA)</b> | <b>Library_ID</b>   |
|----------------------------------------|---------------------------|--------------|-----------------------------|----------------------------|-------------------------------|---------------------|
| KRSE4-3 ROV SED 1                      | SRR22738865               | SRP413057    | PRJNA910929                 | SAMN32151271               | Dive_3_Sample_5               | Dive_3_Sample_5_R1  |
| KRSE4-3 ROV SED 1                      |                           |              |                             |                            | Dive_3_Sample_5               | Dive_3_Sample_5_R2  |
| KRSE4-3 ROV SED 1                      | SRR22738866               | SRP413057    | PRJNA910929                 | SAMN32151272               | Dive_3_Sample_6               | Dive_3_Sample_6_R1  |
| KRSE4-3 ROV SED 1                      |                           |              |                             |                            | Dive_3_Sample_6               | Dive_3_Sample_6_R2  |
| KRSE4-3 ROV SED 4                      | SRR22738864               | SRP413057    | PRJNA910929                 | SAMN32151273               | Dive_3_Sample_7               | Dive_3_Sample_7_R1  |
| KRSE4-3 ROV SED 4                      |                           |              |                             |                            | Dive_3_Sample_7               | Dive_3_Sample_7_R2  |
| KRSE4-3 ROV SED 4                      | SRR22738863               | SRP413057    | PRJNA910929                 | SAMN32151274               | Dive_3_Sample_8               | Dive_3_Sample_8_R1  |
| KRSE4-3 ROV SED 4                      |                           |              |                             |                            | Dive_3_Sample_8               | Dive_3_Sample_8_R2  |
| KRSE4-3 ROV SED 4                      | SRR22738862               | SRP413057    | PRJNA910929                 | SAMN32151275               | Dive_3_Sample_9               | Dive_3_Sample_9_R1  |
| KRSE4-3 ROV SED 4                      |                           |              |                             |                            | Dive_3_Sample_9               | Dive_3_Sample_9_R2  |
| KRSE4-3 ROV SED 2                      | SRR22738861               | SRP413057    | PRJNA910929                 | SAMN32151276               | Dive_3_Sample_10              | Dive_3_Sample_10_R1 |
| KRSE4-3 ROV SED 2                      |                           |              |                             |                            | Dive_3_Sample_10              | Dive_3_Sample_10_R2 |
| KRSE4-3 ROV SED 2                      | SRR22738860               | SRP413057    | PRJNA910929                 | SAMN32151277               | Dive_3_Sample_11              | Dive_3_Sample_11_R1 |
| KRSE4-3 ROV SED 2                      |                           |              |                             |                            | Dive_3_Sample_11              | Dive_3_Sample_11_R2 |
| KRSE4-3 ROV SED 2                      | SRR22738858               | SRP413057    | PRJNA910929                 | SAMN32151278               | Dive_3_Sample_12              | Dive_3_Sample_12_R1 |
| KRSE4-3 ROV SED 2                      |                           |              |                             |                            | Dive_3_Sample_12              | Dive_3_Sample_12_R2 |
| KRSE4-3 ROV SED 1                      | SRR22738857               | SRP413057    | PRJNA910929                 | SAMN32151279               | Dive_3_Sample_13              | Dive_3_Sample_13_R1 |
| KRSE4-3 ROV SED 1                      |                           |              |                             |                            | Dive_3_Sample_13              | Dive_3_Sample_13_R2 |
| KRSE4-3 ROV SED 1                      | SRR22738856               | SRP413057    | PRJNA910929                 | SAMN32151280               | Dive_3_Sample_14              | Dive_3_Sample_14_R1 |
| KRSE4-3 ROV SED 1                      |                           |              |                             |                            | Dive_3_Sample_14              | Dive_3_Sample_14_R2 |
| KRSE4-3 ROV SED 1                      | SRR22738854               | SRP413057    | PRJNA910929                 | SAMN32151281               | Dive_3_Sample_15              | Dive_3_Sample_15_R1 |
| KRSE4-3 ROV SED 1                      |                           |              |                             |                            | Dive_3_Sample_15              | Dive_3_Sample_15_R2 |
| KRSE4-3 ROV SED 4                      | SRR22738855               | SRP413057    | PRJNA910929                 | SAMN32151282               | Dive_3_Sample_16              | Dive_3_Sample_16_R1 |
| KRSE4-3 ROV SED 4                      |                           |              |                             |                            | Dive_3_Sample_16              | Dive_3_Sample_16_R2 |
| KRSE4-3 ROV SED 4                      | SRR22738853               | SRP413057    | PRJNA910929                 | SAMN32151283               | Dive_3_Sample_17              | Dive_3_Sample_17_R1 |
| KRSE4-3 ROV SED 4                      |                           |              |                             |                            | Dive_3_Sample_17              | Dive_3_Sample_17_R2 |



**Supplementary Table 5: Microbiological (NCBI) labels (*continued*)**

| <b>Original expedition sample name</b> | <b>Title</b>                                 | <b>Filename</b>                            |
|----------------------------------------|----------------------------------------------|--------------------------------------------|
| KRSE4-3 ROV SED 1                      | Dive 3_mat_sample 2 = biological replicate 2 | Dive-3-Sample-5_S897_L002_R1_001.fastq.gz  |
| KRSE4-3 ROV SED 1                      | Dive 3_mat_sample 2 = biological replicate 2 | Dive-3-Sample-5_S897_L002_R2_001.fastq.gz  |
| KRSE4-3 ROV SED 1                      | Dive 3_mat_sample 2 = biological replicate 3 | Dive-3-Sample-6_S898_L002_R1_001.fastq.gz  |
| KRSE4-3 ROV SED 1                      | Dive 3_mat_sample 2 = biological replicate 3 | Dive-3-Sample-6_S898_L002_R2_001.fastq.gz  |
| KRSE4-3 ROV SED 4                      | Dive 3_mat_sample 3 = biological replicate 1 | Dive-3-Sample-7_S899_L002_R1_001.fastq.gz  |
| KRSE4-3 ROV SED 4                      | Dive 3_mat_sample 3 = biological replicate 1 | Dive-3-Sample-7_S899_L002_R2_001.fastq.gz  |
| KRSE4-3 ROV SED 4                      | Dive 3_mat_sample 3= biological replicate 2  | Dive-3-Sample-8_S900_L002_R1_001.fastq.gz  |
| KRSE4-3 ROV SED 4                      | Dive 3_mat_sample 3= biological replicate 2  | Dive-3-Sample-8_S900_L002_R2_001.fastq.gz  |
| KRSE4-3 ROV SED 4                      | Dive 3_mat_sample 3 = biological replicate 3 | Dive-3-Sample-9_S901_L002_R1_001.fastq.gz  |
| KRSE4-3 ROV SED 4                      | Dive 3_mat_sample 3 = biological replicate 3 | Dive-3-Sample-9_S901_L002_R2_001.fastq.gz  |
| KRSE4-3 ROV SED 2                      | Dive 3_sed_sample 1 = biological replicate 1 | Dive-3-Sample-10_S902_L002_R1_001.fastq.gz |
| KRSE4-3 ROV SED 2                      | Dive 3_sed_sample 1 = biological replicate 1 | Dive-3-Sample-10_S902_L002_R2_001.fastq.gz |
| KRSE4-3 ROV SED 2                      | Dive 3_sed_sample 1 = biological replicate 2 | Dive-3-Sample-11_S903_L002_R1_001.fastq.gz |
| KRSE4-3 ROV SED 2                      | Dive 3_sed_sample 1 = biological replicate 2 | Dive-3-Sample-11_S903_L002_R2_001.fastq.gz |
| KRSE4-3 ROV SED 2                      | Dive 3_sed_sample 1 = biological replicate 3 | Dive-3-Sample-12_S904_L002_R1_001.fastq.gz |
| KRSE4-3 ROV SED 2                      | Dive 3_sed_sample 1 = biological replicate 3 | Dive-3-Sample-12_S904_L002_R2_001.fastq.gz |
| KRSE4-3 ROV SED 1                      | Dive 3_sed_sample 2 = biological replicate 1 | Dive-3-Sample-13_S905_L002_R1_001.fastq.gz |
| KRSE4-3 ROV SED 1                      | Dive 3_sed_sample 2 = biological replicate 1 | Dive-3-Sample-13_S905_L002_R2_001.fastq.gz |
| KRSE4-3 ROV SED 1                      | Dive 3_sed_sample 2= biological replicate 2  | Dive-3-Sample-14_S906_L002_R1_001.fastq.gz |
| KRSE4-3 ROV SED 1                      | Dive 3_sed_sample 2= biological replicate 2  | Dive-3-Sample-14_S906_L002_R2_001.fastq.gz |
| KRSE4-3 ROV SED 1                      | Dive 3_sed_sample 2 = biological replicate 3 | Dive-3-Sample-15_S907_L002_R1_001.fastq.gz |
| KRSE4-3 ROV SED 1                      | Dive 3_sed_sample 2 = biological replicate 3 | Dive-3-Sample-15_S907_L002_R2_001.fastq.gz |
| KRSE4-3 ROV SED 4                      | Dive 3_sed_sample 3 = biological replicate 1 | Dive-3-Sample-16_S908_L002_R1_001.fastq.gz |
| KRSE4-3 ROV SED 4                      | Dive 3_sed_sample 3 = biological replicate 1 | Dive-3-Sample-16_S908_L002_R2_001.fastq.gz |
| KRSE4-3 ROV SED 4                      | Dive 3_sed_sample 3 = biological replicate 2 | Dive-3-Sample-17_S909_L002_R1_001.fastq.gz |
| KRSE4-3 ROV SED 4                      | Dive 3_sed_sample 3 = biological replicate 2 | Dive-3-Sample-17_S909_L002_R2_001.fastq.gz |

**Supplementary Table 5: Microbiological (NCBI) labels (*continued*)**

| <b>Original expedition sample name</b> | <b>NCBI SRA accession</b> | <b>Study</b> | <b>Bioproject accession</b> | <b>Biosample accession</b> | <b>Sample_name (NCBI SRA)</b> | <b>Library_ID</b>   |
|----------------------------------------|---------------------------|--------------|-----------------------------|----------------------------|-------------------------------|---------------------|
| KRSE4-3 ROV SED 4                      | SRR22738852               | SRP413057    | PRJNA910929                 | SAMN32151284               | Dive_3_Sample_18              | Dive_3_Sample_18_R1 |
| KRSE4-3 ROV SED 4                      |                           |              |                             |                            | Dive_3_Sample_18              | Dive_3_Sample_18_R2 |
| KRSE4-4 ROV HYD X                      | SRR22738851               | SRP413057    | PRJNA910929                 | SAMN32151285               | Dive_4_Sample_1               | Dive_4_Sample_1_R1  |
| KRSE4-4 ROV HYD X                      |                           |              |                             |                            | Dive_4_Sample_1               | Dive_4_Sample_1_R2  |
| KRSE4-4 ROV HYD X                      | SRR22738850               | SRP413057    | PRJNA910929                 | SAMN32151286               | Dive_4_Sample_2               | Dive_4_Sample_2_R1  |
| KRSE4-4 ROV HYD X                      |                           |              |                             |                            | Dive_4_Sample_2               | Dive_4_Sample_2_R2  |
| KRSE4-4 ROV HYD X                      | SRR22738849               | SRP413057    | PRJNA910929                 | SAMN32151287               | Dive_4_Sample_3               | Dive_4_Sample_3_R1  |
| KRSE4-4 ROV HYD X                      |                           |              |                             |                            | Dive_4_Sample_3               | Dive_4_Sample_3_R2  |
| KRSE4-6 ROV NET                        | SRR22738847               | SRP413057    | PRJNA910929                 | SAMN32151288               | Dive_6_Sample_1               | Dive_6_Sample_1_R1  |
| KRSE4-6 ROV NET                        |                           |              |                             |                            | Dive_6_Sample_1               | Dive_6_Sample_1_R2  |
| KRSE4-6 ROV NET                        | SRR22738846               | SRP413057    | PRJNA910929                 | SAMN32151289               | Dive_6_Sample_2               | Dive_6_Sample_2_R1  |
| KRSE4-6 ROV NET                        |                           |              |                             |                            | Dive_6_Sample_2               | Dive_6_Sample_2_R2  |
| KRSE4-6 ROV NET                        | SRR22738845               | SRP413057    | PRJNA910929                 | SAMN32151290               | Dive_6_Sample_3               | Dive_6_Sample_3_R1  |
| KRSE4-6 ROV NET                        |                           |              |                             |                            | Dive_6_Sample_3               | Dive_6_Sample_3_R2  |
| KRSE4-6 ROV NET                        | SRR22738843               | SRP413057    | PRJNA910929                 | SAMN32151291               | Dive_6_Sample_4               | Dive_6_Sample_4_R1  |
| KRSE4-6 ROV NET                        |                           |              |                             |                            | Dive_6_Sample_4               | Dive_6_Sample_4_R2  |
| KRSE4-6 ROV NET                        | SRR22738844               | SRP413057    | PRJNA910929                 | SAMN32151292               | Dive_6_Sample_5               | Dive_6_Sample_5_R1  |
| KRSE4-6 ROV NET                        |                           |              |                             |                            | Dive_6_Sample_5               | Dive_6_Sample_5_R2  |
| KRSE4-6 ROV NET                        | SRR22738842               | SRP413057    | PRJNA910929                 | SAMN32151293               | Dive_6_Sample_6               | Dive_6_Sample_6_R1  |
| KRSE4-6 ROV NET                        |                           |              |                             |                            | Dive_6_Sample_6               | Dive_6_Sample_6_R2  |
| KRSE4-6 ROV NET                        | SRR22738841               | SRP413057    | PRJNA910929                 | SAMN32151294               | Dive_6_Sample_7               | Dive_6_Sample_7_R1  |
| KRSE4-6 ROV NET                        |                           |              |                             |                            | Dive_6_Sample_7               | Dive_6_Sample_7_R2  |
| KRSE4-6 ROV NET                        | SRR22738840               | SRP413057    | PRJNA910929                 | SAMN32151295               | Dive_6_Sample_8               | Dive_6_Sample_8_R1  |
| KRSE4-6 ROV NET                        |                           |              |                             |                            | Dive_6_Sample_8               | Dive_6_Sample_8_R2  |

**Supplementary Table 5: Microbiological (NCBI) labels (*continued*)**

| <b>Original expedition sample name</b> | <b>Title</b>                                | <b>Filename</b>                            |
|----------------------------------------|---------------------------------------------|--------------------------------------------|
| KRSE4-3 ROV SED 4                      | Dive 3_sed_sample 3= biological replicate 3 | Dive-3-Sample-18_S910_L002_R1_001.fastq.gz |
| KRSE4-3 ROV SED 4                      | Dive 3_sed_sample 3= biological replicate 3 | Dive-3-Sample-18_S910_L002_R2_001.fastq.gz |
| KRSE4-4 ROV HYD X                      | Dive 4_sample 1 = biological replicate 1    | Dive-4-Sample-1_S911_L002_R1_001.fastq.gz  |
| KRSE4-4 ROV HYD X                      | Dive 4_sample 1 = biological replicate 1    | Dive-4-Sample-1_S911_L002_R2_001.fastq.gz  |
| KRSE4-4 ROV HYD X                      | Dive 4_sample 1 = biological replicate 2    | Dive-4-Sample-2_S912_L002_R1_001.fastq.gz  |
| KRSE4-4 ROV HYD X                      | Dive 4_sample 1 = biological replicate 2    | Dive-4-Sample-2_S912_L002_R2_001.fastq.gz  |
| KRSE4-4 ROV HYD X                      | Dive 4_sample 1= biological replicate 3     | Dive-4-Sample-3_S913_L002_R1_001.fastq.gz  |
| KRSE4-4 ROV HYD X                      | Dive 4_sample 1= biological replicate 3     | Dive-4-Sample-3_S913_L002_R2_001.fastq.gz  |
| KRSE4-6 ROV NET                        | Dive 6_sample 1 = biological replicate 1    | Dive-6-Sample-1_S914_L002_R1_001.fastq.gz  |
| KRSE4-6 ROV NET                        | Dive 6_sample 1 = biological replicate 1    | Dive-6-Sample-1_S914_L002_R2_001.fastq.gz  |
| KRSE4-6 ROV NET                        | Dive 6_sample 1 = biological replicate 2    | Dive-6-Sample-2_S915_L002_R1_001.fastq.gz  |
| KRSE4-6 ROV NET                        | Dive 6_sample 1 = biological replicate 2    | Dive-6-Sample-2_S915_L002_R2_001.fastq.gz  |
| KRSE4-6 ROV NET                        | Dive 6_sample 1= biological replicate 3     | Dive-6-Sample-3_S916_L002_R1_001.fastq.gz  |
| KRSE4-6 ROV NET                        | Dive 6_sample 1= biological replicate 3     | Dive-6-Sample-3_S916_L002_R2_001.fastq.gz  |
| KRSE4-6 ROV NET                        | Dive 6_sample 2= biological replicate 1     | Dive-6-Sample-4_S917_L002_R1_001.fastq.gz  |
| KRSE4-6 ROV NET                        | Dive 6_sample 2= biological replicate 1     | Dive-6-Sample-4_S917_L002_R2_001.fastq.gz  |
| KRSE4-6 ROV NET                        | Dive 6_sample 2= biological replicate 2     | Dive-6-Sample-5_S918_L002_R1_001.fastq.gz  |
| KRSE4-6 ROV NET                        | Dive 6_sample 2= biological replicate 2     | Dive-6-Sample-5_S918_L002_R2_001.fastq.gz  |
| KRSE4-6 ROV NET                        | Dive 6_sample 2= biological replicate 3     | Dive-6-Sample-6_S919_L002_R1_001.fastq.gz  |
| KRSE4-6 ROV NET                        | Dive 6_sample 2= biological replicate 3     | Dive-6-Sample-6_S919_L002_R2_001.fastq.gz  |
| KRSE4-6 ROV NET                        | Dive 6_sample 2= biological replicate 4     | Dive-6-Sample-7_S920_L002_R1_001.fastq.gz  |
| KRSE4-6 ROV NET                        | Dive 6_sample 2= biological replicate 4     | Dive-6-Sample-7_S920_L002_R2_001.fastq.gz  |
| KRSE4-6 ROV NET                        | Dive 6_sample 2= biological replicate 5     | Dive-6-Sample-8_S921_L002_R1_001.fastq.gz  |
| KRSE4-6 ROV NET                        | Dive 6_sample 2= biological replicate 5     | Dive-6-Sample-8_S921_L002_R2_001.fastq.gz  |

## Supplementary References

1. Graber, S. *et al.* Structural Control, Evolution, and Accumulation Rates of Massive Sulfides in the TAG Hydrothermal Field. *Geochemistry Geophysics Geosystems* **21**, 389–25 (2020).
2. Clague, D.A. *et al.* High-resolution AUV mapping and targeted ROV observations of three historical lava flows at Axial Seamount. *Oceanography*, **30**, 82-99 (2017).
3. van der Zwan, F.M. *et al.* Hydrothermal activity at the ultraslow- to slow-spreading Red Sea Rift traced by chlorine in basalt. *Chemical Geology* **405**, 63-81 (2015).
4. Pedersen, R. B. *et al.* Hydrothermal Activity at the Arctic Mid-Ocean Ridges. in Diversity of Hydrothermal Systems on Slow Spreading Ocean Ridges 67–89 (American Geophysical Union, 2010). doi:10.1029/2008gm000783.
5. Johannessen, K. C. *et al.* Environmental controls on biomineralization and Fe-mound formation in a low-temperature hydrothermal system at the Jan Mayen Vent Fields. *Geochim Cosmochim Acta* **202**, 101–123 (2017).
6. Peng, X. *et al.* Diversity of biogenic minerals in low-temperature Si-rich deposits from a newly discovered hydrothermal field on the ultraslow spreading Southwest Indian Ridge. *J Geophys Res Biogeosciences* **116**, (2011).
7. Choukroune, P. *et al.* Tectonics of an incipient oceanic rift. *Mar Geophys Res* **9**, 147–163 (1988).
8. Juniper, S. K., Tunncliffe, V. & Desbruyères, D. Regional-Scale Features of Northeast Pacific, East Pacific Rise, and Gulf of Aden Vent Communities. in *Gorda Ridge, A Seafloor Spreading Center in the United States' Exclusive Economic Zone* (ed. McMurray, G. R.) 265–278 (Springer, 1990). doi:10.1007/978-1-4612-3258-2\_19.
9. Lisitsyn, A. P. *et al.* Active hydrothermal activity at Franklin Seamount, Western Woodlark Sea (Papua New Guinea). *Int Geol Rev* **33**, 914–929 (1991).
10. Boyd, T. & Scott, S. Microbial and hydrothermal aspects of ferric oxyhydroxides and ferrosic hydroxides: the example of Franklin Seamount, Western Woodlark Basin, Papua New Guinea. *Geochem T* **2**, 45 (2001).
11. Fouquet, Y. & Stackelberg, U. von. *NAUTILAU French-German Diving Cruise with Nautila April 17 - May 10 1989*. (1989).
12. Takai, K. *et al.* Variability in the microbial communities and hydrothermal fluid chemistry at the newly discovered Mariner hydrothermal field, southern Lau Basin. *Journal of Geophysical Research* **113**, (2008).
13. Sun, Z. *et al.* Hydrothermal Fe–Si–Mn oxide deposits from the Central and South Valu Fa Ridge, Lau Basin. *Appl Geochem* **26**, 1192–1204 (2011).
14. Haase, K. M. *et al.* Diking, young volcanism and diffuse hydrothermal activity on the southern Mid-Atlantic Ridge: The Lilliput field at 9°33'S. *Marine Geology* **266**, 52–64 (2009).
15. Kennedy, C. B., Scott, S. D. & Ferris, F. G. Characterization of Bacteriogenic Iron Oxide Deposits from Axial Volcano, Juan de Fuca Ridge, Northeast Pacific Ocean. *Geomicrobiol J* **20**, 199–214 (2003).
16. Lonsdale, P. Deep-tow observations at the mounds abyssal hydrothermal field, Galapagos Rift. *Earth Planet Sc Lett* **36**, 92–110 (1977).
17. Alt, J. C. Hydrothermal oxide and nontronite deposits on seamounts in the eastern Pacific. *Mar Geol* **81**, 227–239 (1988).
18. LaFemina, P. C. The Encyclopedia of Volcanoes (Second Edition). *Part : Orig. Transp. Magma* 65–92 (2015) doi:10.1016/b978-0-12-385938-9.00003-1.
19. Argus, D. F., Gordon, R. G. & DeMets, C. Geologically current motion of 56 plates relative to the no-net-rotation reference frame. *Geochemistry Geophysics Geosystems* **12**, (2011).
20. DeMets, C., Gordon, R. G., Argus, D. F. & Stein, S. Effect of recent revisions to the geomagnetic reversal time scale on estimates of current plate motions. *Geophys Res Lett* **21**, 2191–2194 (1994).
